1  
2  
3  
4  
5  
6  
7  
8  
9  
10  
11  
12  
13  
14  
15  
16  
17  
18  
19  
20  
21  
22  
23  
24  
25  
26  
27  
28  
29  
30  
31

**Noncanonical functions of Ku may underlie essentiality in human cells**

**Short title: Ku essentiality in humans**

Rachel D. Kelly<sup>1,2</sup>, Gursimran Parmar<sup>1,2</sup>, Laila Bayat<sup>1,2</sup>, Matthew E.R. Maitland<sup>1,2</sup>, Gilles A. Lajoie<sup>1</sup>, David R. Edgell<sup>1</sup>, Caroline Schild-Poulter<sup>1,2</sup>

<sup>1</sup>Department of Biochemistry, <sup>2</sup>Robarts Research Institute, Schulich School of Medicine and Dentistry, Western University, London, Ontario, Canada

\* Corresponding author

Email: [cschild-poulter@robarts.ca](mailto:cschild-poulter@robarts.ca)

32 **Abstract**

33 The Ku70/80 heterodimer is a key player in non-homologous end-joining DNA repair but  
34 has also been involved in other cellular functions like telomere regulation and  
35 maintenance, in which Ku's role is not fully characterized. It was previously reported that  
36 knockout of Ku80 in a human cell line results in lethality, but the underlying cause of Ku  
37 essentiality in human cells has yet to be fully explored. Here, we established conditional  
38 Ku70 knockout cells to study the essentiality of Ku70 function. Endogenous Ku70  
39 knockout was achieved using CRISPR/Cas9 editing in cells where Ku70 expression was  
40 maintained through integration of an HA-tagged Ku70 cDNA under the control of a  
41 doxycycline-inducible promoter. Ku70 conditional knockout cell lines were identified via  
42 western blotting, and edits were validated by Sanger sequencing. We visually observed  
43 cell death in Ku70 knockout cells 8-10 days post Ku70-HA depletion, and loss of viability  
44 following Ku depletion was quantified using crystal violet assays. Interestingly,  
45 assessment of telomere length in Ku70 knockout cells using telomere restriction  
46 fragment analyses did not reveal any changes in average telomere length following  
47 Ku70-HA depletion. Immunofluorescence analysis used to assess  $\gamma$ H2AX foci  
48 accumulation as a measure of double-stranded DNA breaks following Ku70-HA  
49 depletion allowed us to conclude that increased DNA damage is not the driving cause of  
50 loss of cell viability. Finally, quantitative proteome analysis of Ku70 knockout cells  
51 following Ku70-HA depletion identified a number of pathways and proteins that are  
52 significantly dysregulated following the loss of Ku70, including processes which Ku  
53 function has been previously associated with such as cell cycle/mitosis, RNA related  
54 processes, and translation/ribosome biogenesis. Overall, this conditional Ku70 knockout

## ***Ku essentiality in humans***

55 system reveals that loss of Ku affects multiple cellular processes and pathways and  
56 suggests that Ku plays critical roles in other cellular processes beyond DNA repair and  
57 telomere maintenance to maintain cell viability.

58

59

60

61

62

63

64

65

66 **Author Summary**

67 The Ku70/80 heterodimer is a key player in non-homologous end-joining DNA repair,  
68 where it acts as a scaffold for other repair factors needed to process double-stranded  
69 DNA breaks. Ku has also been involved in other cellular functions like telomere  
70 regulation and maintenance, in which Ku's role is not fully characterized. Previous data  
71 suggest that while loss of Ku70/80 can be tolerated in other species, Ku is essential to  
72 humans. We have established a conditional Ku70 knockout in HEK293 cells to evaluate  
73 the basis of Ku essentiality in human cells. While we observed loss of cell viability upon  
74 Ku depletion, we did not observe significant changes in telomere length nor did we  
75 record lethal levels of DNA damage upon loss of Ku, suggesting that the reasons for the  
76 loss of viability is not linked to the functions of Ku in DNA repair or at telomeres.  
77 Analysis of global proteome changes following Ku70 depletion revealed dysregulations  
78 of several cellular pathways including cell cycle/mitosis, RNA related processes, and  
79 translation/ribosome biogenesis. Our study reveals that loss of Ku affects multiple  
80 cellular processes and pathways and suggests that Ku plays critical roles in cellular  
81 processes beyond DNA repair and telomere maintenance to maintain cell viability.

82

83

84

85

86

87

88



## 89 **Introduction**

90           One of the most hazardous forms of DNA damage that can arise from cellular  
91 processes are double-stranded DNA breaks (DSBs). Intracellular sources such as  
92 replication errors in dividing cells, reactive oxygen species formed as by-products of  
93 cellular metabolism, enzymatic action, and physical or mechanical stress can all lead to  
94 DSBs[1,2]. Extracellular sources or environmental factors such as ionizing radiation,  
95 ultraviolet light, and chemical agents can also be a source for DSB formation. In  
96 mammalian cells, the primary method for repair of DSBs is the non-homologous end-  
97 joining (NHEJ) pathway, where repair factors work in synergy to directly ligate broken  
98 DNA[2].

99           Given the threat to genomic integrity that DSBs pose, efficient repair is a  
100 necessity for cellular survival. One of the first responders in the NHEJ pathway is a key  
101 protein known as Ku, which can arrive at the site of a break within seconds of the  
102 damage occurring[3,4]. Ku is a heterodimer composed of two subunits, Ku70 and Ku80,  
103 and together the subunits form a ring-like structure that has high affinity for double-  
104 stranded DNA ends[5]. In the event of a DSB, Ku proteins will bind to each of the broken  
105 double-stranded ends in a sequence-independent manner[5,6]. Once bound, the Ku  
106 heterodimer interacts with the DNA protein kinase catalytic subunit (DNA-PK<sub>cs</sub>) to form  
107 the DNA-PK complex that acts as a scaffold for other repair factors needed to ligate the  
108 DNA lesion[7]. Though the Ku heterodimer is best known for its role in NHEJ, it is also  
109 involved in other cellular processes. However, the precise functions of Ku in these  
110 pathways are not fully understood[8].

## ***Ku essentiality in humans***

111           A few of Ku's vital roles outside of NHEJ include V(D)J recombination and  
112 telomere regulation and maintenance[9,10]. In mammals, single-stranded DNA  
113 overhangs at the ends of telomeres invade double-stranded repetitive telomeric  
114 TTAGGG sequences, and associate with six proteins of the shelterin complex to form  
115 structures known as t-loops[11,12]. T-loops are essential to protecting DNA ends from  
116 being recognized as damage by DNA repair machinery, thus preventing chromosomal  
117 fusions and genomic instability[12].

118           Interestingly, loss of Ku appears to have different effects on telomere  
119 maintenance between species. In yeast, Ku binds to the RNA component of yeast  
120 telomerase (TLC1), specifically interacting with the stem loop of TLC1 to promote  
121 telomerase recruitment to telomeres, thus aiding in telomere lengthening[13]. Loss of Ku  
122 in yeast results in telomere shortening and can result in unwanted recombination  
123 between telomere ends[14]. In *Drosophila melanogaster*, a loss of Ku protein causes  
124 greater deprotection of telomere ends, leading to telomere lengthening that is observed  
125 in the absence of Ku[15]. In mammals, Ku has also been found to regulate telomere  
126 length. In mice, depletion of Ku results in both telomere lengthening and shortening, as  
127 well as increased chromosomal fusions[16–18]. Human Ku protein interacts with the  
128 telomerase RNA component (hTR) and the telomerase catalytic component (hTERT),  
129 and shelterin complex members[19,20]. Human cells depleted of Ku display shortened  
130 telomeres and an increase in cell death[10,21,22]. A Ku80 knockout in human colon  
131 cancer HCT116 cells showed loss of telomere length, that was suggested to have  
132 occurred through formation of extrachromosomal circles of cleaved telomeric repeats

## ***Ku essentiality in humans***

133 known as t-circles[22,23]. Telomere loss and cell death in HCT116 cells suggests that  
134 Ku may perform an essential role in human cells at telomeres[10,22].

135       Homozygous knockout of either Ku70 or Ku80 subunits in mice causes a set of  
136 distinct phenotypic effects that are not displayed in heterozygous knockouts of  
137 Ku70/80[24,25]. Characteristic phenotypes associated with Ku80 knockouts in mice  
138 include proportionally smaller body size, a loss of proliferating cells, longer cell doubling  
139 times, radiation sensitivity, deficiency in V(D)J rearrangement, and an arrest in the  
140 development of B and T lymphocytes[24]. Ku70 knockouts in mice resulted in similar  
141 deficiencies to Ku80 knockouts, but were also associated with a higher incidence of  
142 thymic tumours[25]. An interesting exception to the general observation that other  
143 species can tolerate a depletion of Ku protein is the fungus *Ustilago maydis*. A depletion  
144 of Ku in the fungus *U. maydis* has been shown to cause cell cycle arrest due to DNA  
145 damage response signaling at telomeres[26].

146       Although mice and other model organisms can tolerate loss of Ku and maintain  
147 viability, current evidence suggests that Ku knockout in human cells is lethal.  
148 Heterogeneous knockouts of Ku80 in HCT116 cells resulted in severe phenotypic  
149 effects, including defects in Ku DNA end-binding activity, sensitivity to ionizing radiation,  
150 and defects in cell proliferation, similar to the phenotypes of homozygous knockouts in  
151 mice[27]. Homozygous knockout of Ku80 in HCT116 cells resulted in loss of cell  
152 viability[22,27]. A study using Nalm-6 cells did not report cell proliferation or telomeric  
153 defects following a heterozygous inactivation of either Ku subunit[28], but another study  
154 using the same cells found variability in the results previously reported[29]. The  
155 discrepancies between different cell lines and studies are not fully understood.

## ***Ku essentiality in humans***

156 Intriguingly, a more recent study reported that a deficiency of Ku protein led to an  
157 adaptive response where the Ku-deficient cancer cells exploited neighbouring cells to  
158 maintain their survival[30].

159         Given Ku's ability to interact with shelterin complex members and telomerase  
160 components, as well as the severe telomeric shortening and loss of cell viability  
161 reported following the loss of Ku protein in human cells, it is possible that Ku is  
162 performing an essential function related to its action at telomeres. To investigate the  
163 function of Ku70, we created a conditional Ku70 knockout using CRISPR/Cas9 in TREx-  
164 293 cells. We find that loss of Ku70 protein levels directly led to a loss of cell viability,  
165 supporting the observation that Ku performs essential functions in human cells.

166 Interestingly, decreased cell viability was not accompanied by critical loss of average  
167 telomere length, and did not appear to result from significant increases in unrepaired  
168 DSBs. Global quantitative proteomic analysis of whole cell extracts from Ku70  
169 knockouts following depletion of Ku70 indicate that loss of Ku affects multiple cellular  
170 processes and pathways, and that Ku appears to play important roles beyond DNA  
171 repair and telomere maintenance in other cellular processes such as cell cycle and  
172 RNA-associated functions.

173

174

175

176

177

178

## 179 **RESULTS**

### 180 **Generation of Ku70 Knockout Cells**

181 To examine the impact of Ku70 knockout on cell viability, we first created a  
182 conditional TReX-293 cell line that expressed an inducible copy of the Ku70 cDNA. This  
183 was done to prevent the loss of cell viability if Ku70 was essential. TReX-293 cells were  
184 stably transfected with a doxycycline (Dox)-inducible exogenous copy of Ku70 cDNA  
185 using the Flp-In system (Flp-In™ T-Rex™, ThermoFisher). The exogenous copy of  
186 Ku70 was tagged at the C-terminus with a human influenza hemagglutinin (HA)  
187 sequence which allows monitoring of expression using an anti-HA antibody (exogenous  
188 Ku70 referred to as Ku70-HA henceforth). Following induction from the Tet-ON  
189 promoter with Dox, we tested the timeline of Ku70-HA depletion upon Dox removal (**Fig**  
190 **1A**). Quantifications showed that, compared to Day 1, Ku70-HA protein abundance was  
191 significantly depleted by Days 4 (by ~87%) while depletion reached ~99% by Day 7 post  
192 Dox removal (**Fig 1B**).

193 A CRISPR knockout strategy utilized three gRNAs simultaneously to target the  
194 exon/intron junctions of Ku70 exons 7, 6, and 12, respectively. The strategy of targeting  
195 the exon/intron junctions of the Ku70 gene was chosen to avoid off-target editing in  
196 Ku70 processed pseudogenes[8]. Targeting exon/intron junctions precluded Cas9  
197 cleavage of Ku70 pseudogenes, or of the Ku70-HA. Editing was induced in the TReX-  
198 293 Ku70-HA cells with SaCas9 or the dual TevCas9 endonuclease[31] (**Fig 1C, S1**  
199 **Fig**). After transfection with SaCas9 or TevCas9, colonies were screened by western  
200 blot for a reduction in endogenous Ku70 after Day 7 post Dox withdrawal (**Fig 1D**). From  
201 this screening, 27 potential Ku70 knockout clonal cell lines were identified. Of the 27

## ***Ku essentiality in humans***

202 Ku70 knockouts, 18 were edited with Cas9 endonuclease cleavage, and 9 were edited  
203 with TevCas9. Edits at the three target sites were validated by T7 endonuclease assays  
204 and Sanger sequencing of PCR products encompassing the editing sites (**Fig 1E**, S1  
205 Data). Three clonal cell lines (Sa11, SB, and TI) that had insertions or deletions at two  
206 target sites were chosen for further characterization (**Fig 1E**).

207

### **Ku70 knockout cells lose viability 8-10 days post exogenous Ku70-HA withdrawal**

209 To establish a timeline for viability in Ku70 knockout cells as Ku70-HA is  
210 depleted, Dox release curves were generated to determine the amount of time between  
211 reduction in Ku70-HA protein and cell death for Ku70 knockout clones. We examined  
212 Ku70-HA protein levels by western blot in one knockout cell line (SB), finding that Ku70-  
213 HA depleted to ~1% of the Day 1 amount by Days 6 and 7 post Dox withdrawal (**Fig 2A**  
214 **and 2B**). Viable Ku70 knockout cells decreased between 8-10 days post Dox  
215 withdrawal. By Day 8 post Dox withdrawal, cells displayed a condensed, rounded  
216 phenotype, and ~60% of the cells had begun to lift off the plate as compared to Day 1  
217 (**Fig 2C**).

218 Crystal violet assays were used to quantify loss of cell viability post Ku70-HA  
219 withdrawal. We plated the TReX-Ku70-HA Control cells, and the Sa11 and TI Ku70  
220 knockout cells on Day 5 post Dox withdrawal along with growth-matched controls of  
221 each of the three cell lines maintained in Dox-containing media. Cells were fixed at 24-  
222 hour timepoints starting at Day 5 post Ku70-HA withdrawal (0h) and ending at Day 9  
223 post Ku70-HA withdrawal (96h). Ku70 knockout cells grown without Dox displayed a  
224 significant reduction in the number of viable cells adhered to the wells of the plate as

## ***Ku essentiality in humans***

225 compared to growth-matched controls (**Fig 2D**). For the Sa11 knockout clone, by Day 9  
226 post Ku70-HA Dox withdrawal, only ~11.6% of the average number of cells were still  
227 adhered compared to the Sa11 Dox On control sample. Similarly, for the TI knockout,  
228 only about ~10% of cells remained 9 days after Dox removal compared to the TI Dox  
229 On control (**Fig 2E**). Collectively, this data indicated that the loss of Ku70 correlated with  
230 a severe decrease in cell viability.

### **Ku70 knockout cells do not undergo significant changes in telomere length following exogenous Ku70-HA withdrawal**

233 Previous studies showed that in HCT116, HeLa, and Nalm-6 cells, loss of Ku  
234 protein resulted in telomere shortening[29,32,33]. We therefore investigated the  
235 telomere status of cells in which Ku70 was depleted. We chose to evaluate average  
236 telomere length at Day 8 post Dox withdrawal because Ku70-HA was maximally  
237 depleted and cells began to lose viability. Average telomere lengths of TReX-293 Sa11,  
238 SB, and TI Ku70 knockout clones were assessed using a telomere restriction fragment  
239 analysis (**Fig 3A**). In the SB Ku70 knockout clone, there was an average telomere  
240 length of 3.1 Kb on Day 1 +Dox and 4.3 Kb on Day 8 no Dox ( $p=0.9274$ ). For another  
241 Ku70 knockout clone, Sa11, there were also no significant changes in telomere length  
242 identified (3.9 Kb on Day 1 Dox and an average length of 4.5 Kb on Day 8 Dox  
243 withdrawal ( $p=0.9998$ ). For the final clone analyzed TI, the average telomere length on  
244 Day 1 Dox was 4.0 Kb and on Day 8 no Dox was 3.6 Kb ( $p>0.9999$ ). The difference in  
245 telomere lengths for Ku70 knockouts were also not significantly different from control  
246 cells that did not undergo Ku70 knockout (TReX-293 Ku70-HA) either at Day 1 (3.3 Kb),  
247 Day 8 (3.6 Kb), and No Dox Day 8 (3.6 Kb). There was also no significant difference in

## ***Ku essentiality in humans***

248 average length compared to TReX-293 cells lacking the exogenous Ku70-HA  
249 exogenous vector (4.6 Kb). Overall, the data show that by Day 8, when Ku expression is  
250 diminished and cell viability starts to be compromised, there is no significant change in  
251 average telomere length when compared to Day 1 when Ku levels are unaffected (**Fig**  
252 **3B**). This data suggests that Ku70 depletion is not associated with telomere shortening  
253 in HEK293 cells.

254

### **255 Examination of $\gamma$ H2AX repair foci accumulation in Ku70 knockout cells**

256 We considered the possibility that loss of cell viability could be due to an  
257 accumulation of unrepaired DSBs in the Ku70 knockout cells. Immunofluorescence was  
258 used to examine  $\gamma$ H2AX foci accumulation, a marker of DSBs, following depletion of  
259 Ku70. Previous work demonstrated that in the absence of Ku80 protein, there is a  
260 significant increase  $\gamma$ H2AX foci, a marker of DSBs, in knockout cells[34]. We analyzed  
261 SB Ku70 knockout cells on Day 1 Dox, and Days 5 and 8 post Dox removal and  
262 compared it to TReX-293 Ku70-HA control cells that were treated with 2 Gy of ionizing  
263 radiation (IR) (**Fig 3C**). The number of foci per nucleus increased from an average of  
264 3.1 foci/nucleus on Day 1 to 7.2 on Day 8 No Dox (S2 Fig). The average number of  
265 foci/nucleus for SB Ku70 knockout cells on Days 1 Dox, and Days 5 and 8 post Dox  
266 removal were found to be significantly lower compared to TReX-293 Ku70-HA control  
267 cells that were treated with 2 Gy of ionizing radiation (18.7 foci/nucleus). However, no  
268 significant differences were found between SB Ku70 knockout cells at the different days  
269 analyzed post Ku70-HA depletion. Density plots of the number of foci/nucleus show a  
270 higher number of cells with more  $\gamma$ H2AX foci in SB Ku70 knockout cells by Day 5 and



## ***Ku essentiality in humans***

271 Day 8 post Ku70-HA removal compared to Day 1 (**Fig 3D**). Despite this general trend,  
272 the majority of nuclei post Ku70-HA depletion contain low numbers of  $\gamma$ H2AX foci that  
273 are similar to cells maintained in Dox and unedited TReX-293 Ku70-HA cells. Overall,  
274 our data show that the elevated amount of  $\gamma$ H2AX foci observed in absence of Ku does  
275 not reach the level induced by 2 Gy of IR which was reported to result in more than 70%  
276 survival using a colony forming assay in HEK293 cells[35]. These findings lead us to  
277 conclude that it is not the accumulation of DSBs that is the driving factor behind the loss  
278 of cell viability in Ku70 knockout cells.

279

### **280 Proteomic analysis of global protein abundance changes in Ku70 knockout cells**

281 To identify pathways that are affected by the loss of Ku expression, we sought to  
282 evaluate the proteomic changes that occur upon Ku depletion. Whole cell extracts of SB  
283 cells subjected to Dox withdrawal and the growth-match controls cultured with Dox on  
284 Days 1, 4, 6 and 7 (N=3) were selected for proteome analysis by mass spectrometry.  
285 These days were chosen because by Day 4 post Dox withdrawal, the relative amount of  
286 Ku70 was reduced significantly (~30% of the amount on Day 1), and the relative amount  
287 of Ku70 was ~1% of the Day 1 amount by Days 6 and 7 post Dox withdrawal, which  
288 occurs before cells are lifting from plates on Day 8 post Dox removal.

289 Using label-free quantification, 5353 proteins were quantified in at least 3  
290 samples (S2 Data). In agreement with the western blot data, Ku70 protein abundance  
291 gradually decreased after Dox removal (**Fig 4A**). By Day 4 following Dox withdrawal,  
292 Ku70 (XRCC6) protein levels were decreased to approximately half of those recorded at  
293 Day 1 and were also significantly decreased compared to the Day 4 +Dox growth-

## ***Ku essentiality in humans***

294 matched control. This trend continued to widen to  $\sim 0.69$  and  $\sim 0.97$  mean differences for  
295 Day 6 and Day 7 Ku-depleted to +Dox growth-matched controls, respectively (**Fig 4A**).  
296 A similar trend was observed for Ku80 relative protein abundance with mean differences  
297 of 0.34 between Dox-depleted and control Day 4 samples, 0.69 on Day 6, and  $\sim 1$  on  
298 Day 7 (**Fig 4A**).

299 We next examined global proteome changes, focusing on Day 4, Day 6, and Day  
300 7 comparisons. The only proteins depleted on all days examined were Ku70 and Ku80.  
301 On Day 4 post Dox withdrawal, 21 proteins were significantly increased  $\geq 1.5$  fold-  
302 change (FC) compared to the growth-matched controls and 16 proteins were decreased  
303  $\geq 1.5$  FC (**Fig 4B**; S3 Data, S3 Fig). By Day 6, 34 proteins were significantly increased  
304  $\geq 1.5$  FC and 66 proteins were decreased  $\geq 1.5$  FC (**Fig 4B**). On Day 7 post Dox  
305 withdrawal, there were 76 proteins increased  $\geq 1.5$  FC and 146 proteins were decreased  
306  $\geq 1.5$  FC (**Fig 4B**, S3 Data). A student's two-way t-test determined that 12 proteins were  
307 significantly altered with a Q value of 0.05 or less on Day 7 (**Table 1**, S4 Data).

308

**Table 1.** Proteins Significantly Changed

| <b>Protein names</b>                                            | <b>Gene names</b> |
|-----------------------------------------------------------------|-------------------|
| X-ray repair cross-complementing protein 6                      | XRCC6             |
| X-ray repair cross-complementing protein 5                      | XRCC5             |
| Eukaryotic translation initiation factor 5                      | EIF5              |
| Eukaryotic translation initiation factor 3 subunit B            | EIF3B             |
| Bystin                                                          | BYSL              |
| Little elongation complex subunit 2                             | ICE2              |
| S1 RNA-binding domain-containing protein 1                      | SRBD1             |
| ADP-ribosylation factor GTPase-activating protein 1             | ARFGAP1           |
| Ubiquitin carboxyl-terminal hydrolase 33                        | USP33             |
| Phosphatidylinositol glycan anchor biosynthesis class U protein | PIGU              |

## *Ku essentiality in humans*

|                                |       |
|--------------------------------|-------|
| Stromal interaction molecule 2 | STIM2 |
| 2-5-oligoadenylate synthase 3  | OAS3  |

---

309

310 Three candidate proteins, MYO6, PDCD4, and EIF3B, were chosen to validate  
311 the quantitative proteomic results based on if they were significantly altered (either  
312 increased or decreased) on Day 6 and Day 7 with a  $\geq 1.5$  fold-change and p-value  
313  $\leq 0.05$ . Western blots for relative protein abundance confirmed that there is a general  
314 trend of decreasing protein abundance for MYO6, PDCD4, and EIF3B for the SB Ku70  
315 knockout clone (**Fig 4C**). Quantification of the three candidate proteins in relation to  
316 alpha-tubulin showed that the mean protein abundance had depleted to  $\sim 6.8\%$  of the  
317 Day 1 Dox abundance for EIF3B by Day 8 (**Fig 4D**). Similarly, by Day 8 post Dox  
318 removal MYO6 showed a decrease in protein abundance of  $\sim 1.5\%$  the mean of Day 1,  
319 and  $\sim 1.7\%$  of the mean relative abundance for PDCD4 (**Fig 4D**). These results were  
320 also validated by western blotting with extracts from another Ku70 knockout clone, Sa11  
321 (S4 Fig). Overall, these data provide validation of proteomic analysis results.

322 Next, we evaluated pathways affected by the loss of Ku expression using  
323 Metascape. From the lists of proteins significantly altered ( $FC \geq 1.5$ , p-value  $\leq 0.05$ ), the  
324 top 10 biological pathway networks were visualized for each day of analysis (Day 4, Day  
325 6, and Day 7) using a heatmap (**Fig 5**, S5 Data). Enriched biological terms associated  
326 with decreased proteins featured on the heatmap were coloured according to p-value.  
327 Some of the networks associated with decreased protein abundances have been  
328 previously associated with Ku function including apoptosis, and other pathways  
329 involving mitosis or the cell cycle have been implicated with Ku, although the precise  
330 function of Ku in these cellular processes is not yet fully understood. Interestingly, the

## ***Ku essentiality in humans***

331 analysis identified pathway networks in which Ku's function is not well established, such  
332 as metabolism of lipids (**Fig 5A**). Notable networks with upregulated proteins included  
333 ncRNA metabolic process, and cell cycle G2/M transition phase, which have been  
334 previously implicated in Ku function[8,26] (**Fig 5B**).

335

336

337

## 338 **Discussion**

339           We created a conditional Ku70 knockout system using TReX-293 cells to  
340 investigate Ku's essentiality in human cells. In this system, we expressed a Dox-  
341 inducible exogenous Ku70-HA and subsequently knocked out endogenous Ku70,  
342 allowing precise monitoring of Ku70 depletion upon Dox removal. We determined that  
343 loss of Ku70 (and its obligate heterodimer partner Ku80) resulted in cell lethality that  
344 occurred shortly after Ku depletion. Cells were nonviable and lifted from plates 8-10  
345 days post removal of doxycycline from the media, at which time the relative amount of  
346 Ku70-HA was reduced to 1% of the initial level prior to Dox removal. The average  
347 telomere length of each of the knockout clones did not change significantly upon Ku70-  
348 HA depletion, and was not significantly different from the average telomere lengths of  
349 unedited cells. Analysis of global proteomic changes between control (Dox on) and Ku-  
350 depleted (Dox off) for the SB Ku70 knockout clone do not show major pathway changes  
351 or protein abundance changes in relation to telomere regulation or maintenance, but  
352 other vital cellular processes are impacted including cell cycle and RNA metabolism.

353           Of the 27 Ku70 knockout clones established, 18 were edited using SaCas9 and 9  
354 were edited with the TevCas9 fusion endonuclease. It has been previously established  
355 that SaCas9 and TevCas9 editing events can result in large deletions of genomic  
356 sequences that are over 2 Kb in length[36], and it is possible that the use of multiple  
357 gRNAs in conjunction with these endonucleases contributed to the heterogenous types  
358 of edits identified, including larger indels. It was also of note that the gRNA for Target 3  
359 in Exon 12 was inefficient for editing and didn't contribute to the creation of Ku70  
360 knockouts characterized in this study. It is also possible that editing by Cas9 at Target 3

## ***Ku essentiality in humans***

361 in exon 12 does not produce knockouts, and that is why indels were not identified at this  
362 exon/intron junction in the knockout clones screened.

363 Previous studies found that the knockout or knockdown of Ku protein resulted in  
364 dramatic telomere shortening in telomerase positive cells[29,32,33,37], but this is not  
365 consistent with our findings in TReX-293 cells, which are also telomerase positive. A  
366 dramatic loss of telomeric TTAGGG repeats could cause a critical telomere length to be  
367 reached where cell cycle arrest and apoptosis is initiated[38], but we did not find a  
368 significant difference in telomeric length compared to unedited cells. Our results parallel  
369 those of Uegaki et al. who reported that a heterozygous inactivation of Ku70 or Ku80 in  
370 telomerase-positive Nalm-6 cells did not result in significant telomere shortening[28].  
371 Experiments involving Ku70/80 knockdown in human cells that do not rely on  
372 telomerase, but another method of telomere length regulation known as alternative  
373 lengthening of telomeres (ALT), also did not display changes in average telomere length  
374 following knockdown of Ku[39]. In accordance with findings from previous  
375 literature[21,29,37,39], the Ku70 knockout human cells we have generated lose viability  
376 following depletion of the exogenous Ku70-HA protein. Collectively, these data suggest  
377 that the dramatic loss of telomere length seen in previous studies may be a specific  
378 phenotype due to variations between cell lines, and that the essential function at Ku  
379 may not be due to telomere length regulation. Moreover, since a critically low telomere  
380 length can induce a DNA damage response (DDR), we would have expected to observe  
381 significant induction of DDR proteins such as p16 or p53, but our proteomic analyses  
382 did not show significant changes in expression that would indicate a response activated  
383 by dysfunctional telomeres.

## ***Ku essentiality in humans***

384           Expectedly, loss of Ku induced an increase in  $\gamma$ H2AX foci as previously  
385 reported[37], due to the loss of NHEJ repair of basal levels of DSBs. However, the  
386 elevated amount of  $\gamma$ H2AX foci observed in absence of Ku did not reach the level  
387 induced by 2 Gy of IR which has been reported to result in about 30% cell death as  
388 assessed by colony formation ability in HEK293 cells[35]. These findings lead us to  
389 conclude that it is not the accumulation of DSBs that is the driving factor behind the loss  
390 of cell viability in Ku70 knockout cells.

391           In examining global proteomic changes following Ku70 depletion, we first noted  
392 that the largest number of protein changes greater than 1.5 fold-change was seen on  
393 Day 7 post Ku70-HA withdrawal compared to control Day 7 samples. This finding is in  
394 line with the observation that Day 7 had the largest mean difference in relative  
395 abundance of both Ku70 and Ku80. Almost double the number of proteins were down  
396 regulated 1.5 FC or greater on Day 7 post Dox withdrawal compared to the number of  
397 proteins upregulated. This difference may be due to the onset in cell death occurring, as  
398 the degradation of cellular components is a key step in apoptosis[40]. One of the  
399 proteins upregulated on Day 7 in Ku70 knockout cells is MTCH1 (Mitochondrial Carrier  
400 1), also known as PSAP (presenilin 1-associated protein), a mitochondrial protein that  
401 has been shown to induce apoptosis when overexpressed in HEK293 cells[41], and has  
402 been more recently shown to have two isoforms that are proapoptotic[42].

403 Downregulation of another protein found on Day 7, TIGAR, was also shown to induce  
404 cell death through accumulation of reactive oxygen species[43,44]. The combined  
405 observations, along with the reduction in anti-apoptosis Bcl-2 family member MCL1[45]  
406 protein levels on Day 6, provide evidence that these cells undergo apoptosis as Ku70

## ***Ku essentiality in humans***

407 protein levels deplete in the conditional knockout cells. Interestingly, MCL1 has also  
408 been identified as an inhibitor of the Ku complex, capable of inhibiting NHEJ DNA repair  
409 to facilitate homologous recombination[45].

410 Of the 10 proteins found dysregulated on Day 7 post-Dox removal, two of them,  
411 eukaryotic translation initiation factor 5 (EIF5) and eukaryotic translation initiation factor  
412 3 subunit B (EIF3B), are initiation factors for the translation of proteins. Translation  
413 initiation and proper formation of the 80S ribosomal initiation complex depends on GTP  
414 hydrolysis by EIF5 and coordinated action of other translation initiation factors like  
415 EIF3B[46]. More recent studies have also shown that knockdown of EIF3B can inhibit  
416 cell cycle progression and proliferation in cancer cells[47,48]. Interestingly, two other  
417 proteins from the list of significantly dysregulated proteins are also involved in  
418 translation. Bystin is a protein that works to promote cell proliferation through formation  
419 of the 40S ribosomal subunit[49], and S1 RNA binding domain 1 (SRBD1) containing  
420 proteins are also predicted to be involved in ribosome biogenesis[50]. It is interesting  
421 that several factors associated with translation and ribosome biogenesis were  
422 significantly dysregulated compared to control cells in our study, as Ku has been  
423 previously implicated with RNA binding[8] and more specifically, it has been implicated  
424 as an interactome member of RNA Polymerase I and RNA involved in ribosome  
425 biogenesis[51]. Ku has also been implicated in rRNA processing via the DNA-PK  
426 complex[52].

427 The functions of the other top proteins found to have significantly altered protein  
428 levels include STIM2 (Stromal Interaction Molecule 2), which is associated with calcium  
429 release in the endoplasmic reticulum that can have an effect on multiple cellular



## ***Ku essentiality in humans***

430 processes[53]. OAS3 (2'-5'-Oligoadenylate Synthetase 3) acts to restrict viral replication  
431 and OAS family members can act as a dsRNA sensor[54]. Ku has also been previously  
432 shown to interact with hairpin structure of RNA[55], and given the relatively new field of  
433 Ku research and RNA biology, it is therefore possible Ku might interact directly or  
434 indirectly with other proteins participating in this sensing system directly or indirectly.  
435 ADP ribosylation factor 1 GTPase activating protein 1 (ARFGAP1) is involved in  
436 membrane trafficking[56] and the relevant biological terms that were found in our  
437 Metascape analysis also reflect vesicle transport as a pathway being dysregulated.  
438 Mitotic cell cycle checkpoints were found to be significantly changed in our pathway  
439 analysis, and from the list of proteins significantly changed between controls and  
440 experimental samples, USP33 (Ubiquitin Specific Peptidase 33) is involved in mitosis  
441 and cell division control[57]. Ku has been previously implicated to play a role in the G1/S  
442 and G2/M checkpoint phases of mitosis, as downregulation of Ku in *U. maydis* resulted  
443 in cell arrest at the G2/M checkpoint[26], and another study noted G2/M defects in Ku-  
444 deficient hamster cells treated with a DNA topoisomerase II inhibitor[58]. Also,  
445 reduction of Ku80 protein levels in human cells was reported to trigger an accumulation  
446 of cells halted at the G1/S transition[59].

447 MYO6 is a motor protein implicated in intracellular vesicle and organelle  
448 transport, and the depletion of this protein has also been shown to affect cell  
449 proliferation/cell cycle progression and result in increased apoptosis in colon cancer  
450 cells[60] and prostate cancer cell lines[61]. The MYO6 interactome identified through  
451 BioID experiments is linked to multiple cellular processes, including centrosomal  
452 proteins that operate in organizing microtubules and have key roles during mitosis[62].

## ***Ku essentiality in humans***

453 One of the BioID interaction network members with MYO6 is PCM1[62], which is also a  
454 significantly dysregulated protein identified in our proteomic analysis results that is  
455 associated with centrosomal functions. PDCD4 is an inhibitor of apoptosis, and has  
456 been shown to increase cell sensitivity to apoptosis[63]. The decrease in EIF3B, MYO6,  
457 and PDCD4 observed in the proteomic analysis and in our validations using western  
458 blots could be contributing to the loss of cell viability and dysregulation of cell cycle that  
459 is noted in the proteomic analyses.

460 Taken together, our results support that the Ku heterodimer does play an  
461 essential role in human cells and maintaining cell viability. Interestingly, our results  
462 indicate that Ku's essential role in humans is not exclusively due to its action in  
463 maintaining telomere length. Our global proteomic analysis showed that a number of  
464 essential cellular processes, such as ribosome biogenesis/translation, RNA interactions,  
465 and mitotic cell cycle control are dysregulated in the absence of Ku. The conditional  
466 Ku70 knockout system developed here will allow us to evaluate more precisely the  
467 molecular links between Ku70 and the identified proteins, and how these relationships  
468 contribute to Ku essentiality in human cells.

469

470

471

472

473

474

475

***Ku essentiality in humans***

476

477

478

479

480

481

482 **MATERIALS AND METHODS**

483 **Plasmid Constructs**

484 px458SpCas9<sub>GFP</sub> (SpCas9-2A-GFP) and px459SpCas9<sub>PuroR</sub> (SpCas9-2A-puro) vectors  
485 were previously obtained from Feng Zhang through Addgene (Addgene plasmid #  
486 48138 and plasmid # 62988) for transfection into mammalian cell lines[64]. The  
487 nuclease, SpCas9, is linked to green fluorescence protein (GFP) and a puromycin  
488 resistance marker, respectively. The SaCas9 construct was created by cloning the full  
489 length SaCas9 into px458SpCas9<sub>GFP</sub> following excision of the SpCas9 insert.

490 Polymerase chain reaction (PCR) amplification of the pac gene encoding puromycin N-  
491 acetyl-transferase from px459SpCas9<sub>PuroR</sub> was used to clone puromycin resistance into  
492 this construct to create px458<sub>PuroR</sub>SaCas9<sub>GFP</sub>. px458<sub>PuroR</sub>TevSaCas9<sub>GFP</sub> was  
493 constructed by cloning I-TevI (amino acids 1–169) in front of the N terminus of SaCas9.  
494 The pBIG2R-Ku70 tetracycline repressible plasmid was created by cloning full length  
495 Ku70 into the multiple cloning site of the pBIG2r vector[65]. An HA-tag was subcloned to  
496 the C-terminus of Ku70 in pBIG2R-Ku70. To create pcDNA5/FRT/TO-Ku70-HA, for the  
497 TREX Ku70-HA tetracycline repressible system, full length Ku70-HA from pBIG2R-  
498 Ku70-HA was PCR-amplified using primers containing restriction enzyme sites and  
499 cloned into pcDNA5/FRT/TO.

500

501 **Designing gRNA**

502 Since Ku70 has five pseudogenes that contain coding sequences from endogenous  
503 Ku70, gRNA was designed to target intron-exon junctions in Ku70. A script was used to  
504 locate potential Cas9 and TevCas9 target sites in Ku70. This script searched the Ku70

## ***Ku essentiality in humans***

505 DNA sequence for regions that spanned intron-exon junctions and had the consensus  
506 sequence required for Tev nuclease and Cas9 nuclease cleavage. The consensus  
507 sequence for SaCas9 and TevSaCas9 target sites was 5' CNNNG(N)<sub>34-40</sub>NNGRRT 3'.  
508 5' CNNNG 3' is the consensus sequence required for Tev nuclease cleavage. 5'  
509 NNGRRT 3' is the PAM sequence for SaCas9 required for Cas9 cleavage.

510

511 Ku70 knockout was carried out using following gRNAs:

512 SaCas9 & TevSaCas9

513 Target 1: 5' AGCTTCAGCTTTAACCTGA 3'

514 Target 2: 5' ACTCAGCAGGTGTGCACTCAGC 3'

515 Target 3: 5' TCATTGCTTCAACCTTGGGCAC 3'

516

517 All of the target sites chosen spanned both intronic and exonic region of the Ku70 gene.  
518 TevCas9 had an additional cut site present upstream of the gRNA in these target sites  
519 determined by the Tev nuclease consensus sequence of 5' CNNNG 3'.

520

521 gRNAs were ordered in the form of synthesized oligonucleotides with *BbsI* cut site

522 compatible overhangs added to each side. The designed gRNA was cloned into

523 px458SpCas9<sub>GFP</sub>, px458TevSpCas9<sub>GFP</sub>, px459SpCas9<sub>PuroR</sub>, and px459SpCas9<sub>PuroR</sub>.

524 This was accomplished using Golden Gate assembly, following the protocol outlined in

525 Engler *et al.*, (2008)[66]. However, the restriction enzyme *BbsI* was used instead of

526 *BsaI*. After Golden Gate assembly, heat shock transformation was performed using

527 *Escherichia coli* (DH5 $\alpha$ ) Plasmids were purified using EZ-10 Spin Column Plasmid DNA

528 Miniprep Kit by (Bio Basic Inc). Correct gRNA insertion was confirmed by DNA  
529 sequencing.

530

### 531 **Cell Culture, treatments, and transfections**

532 HEK293 TReX cells (Invitrogen Canada Inc.) were cultured in high-glucose Dulbecco's  
533 modified Eagle's medium (DMEM) supplemented with 10% fetal bovine serum (FBS) at  
534 37 °C in 5% CO<sub>2</sub>. to which 1% L-glutamine, and 1% sodium pyruvate were added.

535 Transfections were performed using jetPRIME Versatile DNA/siRNA transfection  
536 reagent, following the manufacturer's instructions (Polyplus Transfection Inc). Antibiotic  
537 was added 24-48 hours after transfection for selection. Single clones that grew in the  
538 presence of antibiotic were moved to 96 well plates and then grown until they could be  
539 moved to 6-well plates. Clones were assessed by western blot for a reduction in Ku70  
540 protein following Dox withdrawal for at least 7 days.

541 Ku70<sup>-/-</sup> cell lines were maintained with 1 µg/mL Doxycycline (BioShop Canada Inc.)  
542 administered every 48 hours, and 15 µg/mL Blasticidin (MULTICELL), and 15 µg/mL  
543 Hygromycin (MULTICELL) which were administered every 96 hours.

544

### 545 **Exogenous Ku70 Depletion Curves and Western Blotting**

546 In 6-well tissue culture dishes, 300,000 cells were plated per well. Ku70<sup>-/-</sup> cell lines were  
547 supplemented with 1 µg/mL Doxycycline (BioShop Canada Inc.) in cell media the day  
548 before the cells were plated onto the 6-well tissue culture dishes without Doxycycline.  
549 Cells were split on Day 3 and Day 5 1:3. Cells were trypsinized, collected, and the pellet  
550 was washed with phosphate-buffered saline (PBS; Wisent). Whole cell extract of cell

## ***Ku essentiality in humans***

551 pellets was generated - cells were lysed on ice for 20 minutes with whole cell extract  
552 buffer (50 mM HEPES pH 7.4, 150 mM NaCl, 1 mM EDTA, 0.5% NP-40, 10% glycerol)  
553 with added inhibitors (PMSF, DTT, Na<sub>3</sub>VO<sub>4</sub>, NaF, Leupeptin, Pepstatin, Aprotinin),  
554 before they were spun down at 13,000 rpm for 20 minutes. Supernatant was collected  
555 and samples were run on 10% or 15% SDS-PAGE and analyzed by western blot using  
556 Clarity Western ECL Blotting Substrates (Bio-Rad Laboratories Inc.) and imaged using a  
557 ChemiDoc MP (Bio-Rad Laboratories Inc.). Primary antibodies used: HA (H3663,  
558 Sigma, 1:1000), Ku70 (N3H10; Santa Cruz Biotechnology, Inc., 1:1000), Ku80 (M-20;  
559 Santa Cruz, 1:500), and mouse  $\alpha$ -tubulin (T5168, Sigma, 1:1000). Primary antibodies of  
560 proteomic analysis candidates validated by western blot: eIF3 $\eta$  (C-5, Santa Cruz,  
561 1:1000), Myosin VI (A-9, Santa Cruz, 1:100), Pdcd-4 (B-4, Santa Cruz, 1:1000), and  
562 Rabbit  $\alpha$ -tubulin (ab15246; Abcam, 1:1000). Secondary antibodies were: Peroxidase-  
563 conjugated AffiniPure Goat Anti-Mouse IgG (1:5000), mouse anti-goat IgG-HRP (Santa  
564 Cruz Biotechnology Inc., 1:3000), goat anti-rabbit IgG (H+L)-HRP Conjugate (BioRad,  
565 1:5000). Western blot samples were quantified using Image Lab 6.0.1. After detection of  
566 lanes and bands, adjusted volumes detected for experimental samples were normalized  
567 using the Day 1 Dox samples for each blot.

### **568 PCR, T7 Endonuclease Assays, and Sanger Sequencing Validation of Editing**

569 Cells were harvested and DNA was extracted from cells using QuickExtract DNA  
570 Extraction Solution (Lucigen Corporation). The pellet was dissolved in 20-80  $\mu$ L of  
571 QuickExtract solution. DNA surrounding target sites 1, 2, and 3 was amplified using  
572 PCR (see Supplementary for primers).

## ***Ku essentiality in humans***

573 T7 Endonuclease I (T7E1) assay was conducted following the extraction of genomic  
574 DNA. T7E1 (New England BioLabs Inc.) was used for this assay. PCR amplified DNA  
575 from potential knockout clones and wild-type DNA were mixed in a reaction in which  
576 DNA was denatured at 95°C for 5 minutes, and then cooled slowly to room temperature  
577 to allow DNA from knockout and wild-type samples to anneal together. T7E1 was then  
578 added (1 µL) to the annealed PCR products and incubated at 37°C for 15 minutes to  
579 allow DNA digestion by the enzyme. T7E1 cuts at mismatches in double-stranded DNA  
580 that occur from annealing of edited knockout DNA with wild-type DNA. Restriction  
581 enzyme products were visualized via agarose gel electrophoresis to identify evidence of  
582 editing in potential Ku70 knockouts.

583 Following a positive T7 endonuclease assay result, PCR amplified DNA of the target  
584 site of interest was purified via a GeneJet PCR Purification kit (ThermoFisher) according  
585 to the manufacturer's instructions. Purified DNA was then sent for Sanger sequencing at  
586 the London Regional Genomics Center. SnapGene was used to align CRISPR edited  
587 DNA with wild type DNA. DECODR.org was used to validate and assess editing  
588 efficiency at target sites.

### **589 Crystal Violet Assays**

590 Control and Ku70 knockout cells were plated onto 96-well plates on Day 5 of Dox  
591 treatment or post Dox withdrawal. For each condition 10,000 cells were plated in a 96-  
592 well plate (5 wells/replicates per clone and condition). Cells were then fixed in 4% PFA  
593 and then incubated in Crystal Violet solution (0.5% in 20% methanol). Pictures were  
594 taken, and then 100uL of 2% SDS was added to each well to dissolve the crystal violet



## ***Ku essentiality in humans***

595 dye and plates were left for 30 minutes at room temperature. The BioTek Epoch  
596 Microplate Spectrophotometer was used to take readings at 550nm wavelengths using  
597 the Gen5 all-in-one platereader program. Graphs were created using GraphPad Prism9.  
598 The number of cells adhered to each well was inferred from a standard curve generated  
599 by plating known numbers of cells and recording readings at 550nm wavelengths.

600

601 Samples and conditions were compared using a two-way ANOVA via Prism9 Matched  
602 values stacked in a sub column with interaction term was included. The Geisser-  
603 Greenhouse correction was also utilized. Within each row, columns were compared with  
604 every other column. Correction for multiple comparisons was done via a Tukey test.

605

### **606 Immunofluorescence of $\gamma$ H2AX foci**

607 Cells were plated with or without doxycycline depending on the condition. After splitting  
608 cells on Days 3 and 5, cells were seeded onto coverslips in a 24-well plate, and  
609 returned to the incubator to be fixed on Day 5 and 8 post Dox removal, respectively.  
610 Cells were fixed with 4% PFA, and processed for indirect immunofluorescence analysis  
611 according to standard protocols using phospho-Histone H2A.X (S139) (20E3) Rabbit  
612 antibody (Cell Signaling Technology, 1:1000) and Alexa Fluor 647 goat anti-rabbit IgG  
613 (H+L) secondary antibody (Invitrogen, 1:1000). Cells were mounted using ProLong  
614 Diamond Antifade Mountant with DAPI (Invitrogen) and imaged the next day using  
615 an Olympus BX51 microscope at 40X magnification and Image-Pro Plus software  
616 (Media Cybernetics, Inc.). ImageJ was used to quantify the number of  $\gamma$ H2AX foci per  
617 nucleus. Nuclei were counted manually and denoted by the freehand selections tool and

618 foci were counted using the find maxima tool (brightness for  $\gamma$ H2AX foci images set to 0-  
619 31, prominence for find maxima set to 2). GaphPad Prism9 was used to generate foci  
620 quantification graphs. An ordinary one-way ANOVA with multiple comparisons was used  
621 to assess statistical significance of foci quantification. Density plots were created using  
622 RStudio.

623

### 624 **Telomere Restriction Fragment (TRF) Analyses**

625  $2.2 \times 10^6$  cells were plated on 10cm plates for each cell line with DMEM (10% FBS).  
626 Cells were plated with or without doxycycline depending on the condition. Cells were  
627 split 1:3 on Day 3 and Day 5. Cells were harvested on Day 1 Dox and Day 8 Dox/No  
628 Dox. DNA from cell pellets was extracted using the PureLink™ Genomic DNA Mini Kit  
629 (Invitrogen) according to the manufacturer's instructions. Mean telomere lengths of  
630 samples were assessed using the TeloTAGGG™ Telomere Length Assay (Roche)  
631 according to manufacturer's instructions aside from modifications listed. For each  
632 sample, 4  $\mu$ g of DNA was digested with Hinf I/Rsa I enzyme mixture. An overnight (14  
633 hour) capillary transfer setup was used to transfer the DNA to BrightStar™ – Plus  
634 positively charged nylon membrane (Invitrogen) using 20X SSC transfer buffer. A DNA  
635 crosslinker was used to fix the DNA on the nylon membrane following overnight transfer.  
636 Chemiluminescent images were taken using a ChemiDoc™ MP Imaging System.  
637 ImageLab was used to assess average telomere lengths for each sample. Graphs were  
638 created using GraphPad Prism9.

639

640

641

642 **Proteomic Analysis by Mass Spectrometry**

643 SB Ku70 knockout cells were plated on 6-well plates (300,000 per well) according to  
644 depletion curve protocols described above. SB cells were plated in duplicate, with one  
645 plate containing +Dox media, and the other -Dox media undergoing Ku70-HA depletion  
646 (N=3) Another two plates were also seeded per replicate for western blots. Samples  
647 were trypsinized, spun down (8,000 rpm for 3 minutes, washed with PBS, and spun  
648 down again) and collected from Day 1 Dox to Day 8 No Dox (or Day 8 Dox for control  
649 group). Samples for western blots were prepared as described above, with 35 µg of  
650 protein loaded per well to 10% SDS-PAGE gels. Samples for mass spectrometry  
651 analysis for global proteomics were prepared exactly as described previously, but  
652 following the digestion and acidification, peptides were desalted using Pierce™ C18  
653 Spin Tips (Cat# 84850)[67]. Samples were then dried in a Speed vacuum, resuspended  
654 in 0.1% formic acid, and quantified by BCA assay. Approximately 500 ng of peptide  
655 sample was injected onto a Waters M-Class nanoAcquity UHPLC system (Waters,  
656 Milford, MA) coupled to an ESI Orbitrap mass spectrometer (Q Exactive plus,  
657 ThermoFisher Scientific) operated as described in Maitland et al, 2021. All MS raw files  
658 were searched in MaxQuant version 1.5.8.3 using the Human Uniprot database  
659 (reviewed only; updated July 2020). Missed cleavages were set to 3, cysteine  
660 carbamidomethylation (CAM) was set as a fixed modification and oxidation (M), N-  
661 terminal acetylation (protein) and deamidation (NQ) were set as variable modifications  
662 (max. number of modifications per peptide = 5), and peptide length ≥6. Protein and  
663 peptide FDR was left to 0.01 (1%) and decoy database was set to revert. Match

## ***Ku essentiality in humans***

664 between runs was enabled and all other parameters left at default[67]. Protein groups  
665 were loaded into Perseus (version 1.6.0.7) and proteins containing peptides only  
666 identified by site, matched to reverse, potential contaminant, or had less than 2 unique  
667 peptides were removed. After log<sub>2</sub> transformation, protein groups were only retained if  
668 they had valid values in  $\geq 3$  samples in either control or Ku70 knockouts for proteome.  
669 For proteome analysis, protein group label-free quantification (LFQ) log<sub>2</sub> transformed  
670 intensities were used. In all datasets, missing values were imputed using a width of 0.3  
671 and down shift of 1.8, and two-sample t tests were performed in Perseus between  
672 control and experimental samples for Days 4, 6, and 7. Proteins were filtered according  
673 to day collected, fold-change ( $\geq 1.5$  FC) and p-value ( $p \leq 0.05$ ). These filtered protein lists  
674 for Days 4, 6, and 7 (Experimental vs Controls) were used for pathway analysis using  
675 Metascape[68]. The mass spectrometry proteomics data have been deposited to the  
676 ProteomeXchange Consortium via the PRIDE [1] partner repository with the dataset  
677 identifier PXD036297[69]. For review purposes, the data can be accessed using the  
678 following Reviewer account details:

679 Username: reviewer\_pxd036297@ebi.ac.uk

680 Password: ulQq8i20

681

682

683

684

685

686

687

688

689

690 **Acknowledgements**

691 We would like to thank the Schild-Poulter and Edgell lab members for their feedback,  
692 expertise, and support they provided on this project. We would also like to thank the  
693 labs of Drs. Murray Junop and David Haniford at Western University for sharing  
694 reagents and the help with equipment use.

695

696

697 **References**

- 698 1. Lieber MR. The mechanism of DSB repair by the NHEJ. *Annu Rev Biochem.*  
699 2011;79: 181–211. doi:10.1146/annurev.biochem.052308.093131.The
- 700 2. Chang HHY, Pannunzio NR, Adachi N, Lieber MR. Non-homologous DNA end  
701 joining and alternative pathways to double-strand break repair. *Nat Rev Mol Cell*  
702 *Biol.* 2017;18: 495–506. doi:10.1038/nrm.2017.48
- 703 3. Mari PO, Florea BI, Persengiev SP, Verkaik NS, Brüggewirth HT, Modesti M, et  
704 al. Dynamic assembly of end-joining complexes requires interaction between  
705 Ku70/80 and XRCC4. *Proc Natl Acad Sci U S A.* 2006;103: 18597–18602.  
706 doi:10.1073/PNAS.0609061103/SUPPL\_FILE/IMAGE530.GIF
- 707 4. Zahid S, El Dahan MS, Iehl F, Fernandez-varela P, Du MH Le, Ropars V, et al.  
708 The Multifaceted Roles of Ku70/80. *Int J Mol Sci* 2021, Vol 22, Page 4134.  
709 2021;22: 4134. doi:10.3390/IJMS22084134
- 710 5. Fell VL, Schild-Poulter C. The Ku heterodimer: Function in DNA repair and  
711 beyond. *Mutat Res - Rev Mutat Res.* 2015;763: 15–29.  
712 doi:10.1016/j.mrrev.2014.06.002
- 713 6. Hsu HL, Yannone SM, Chen DJ. Defining interactions between DNA-PK and  
714 ligase IV/XRCC4. *DNA Repair (Amst).* 2002;1: 225–235. doi:10.1016/S1568-  
715 7864(01)00018-0
- 716 7. Frit P, Ropars V, Modesti M, Charbonnier JB, Calsou P. Plugged into the Ku-DNA  
717 hub: The NHEJ network. *Progress in Biophysics and Molecular Biology.* Elsevier  
718 Ltd; 2019. pp. 62–76. doi:10.1016/j.pbiomolbio.2019.03.001
- 719 8. Abbasi S, Parmar G, Kelly RD, Balasuriya N, Schild-Poulter C. The Ku complex:  
720 recent advances and emerging roles outside of non-homologous end-joining. *Cell*  
721 *Mol Life Sci.* 2021; doi:10.1007/s00018-021-03801-1
- 722 9. Christie SM, Fijen C, Rothenberg E. V(D)J Recombination: Recent Insights in  
723 Formation of the Recombinase Complex and Recruitment of DNA Repair  
724 Machinery. *Front Cell Dev Biol.* 2022;0: 850. doi:10.3389/FCELL.2022.886718
- 725 10. Indiviglio SM, Bertuch AA. Ku’s essential role in keeping telomeres intact  
726 [Internet]. *Proceedings of the National Academy of Sciences of the United States*  
727 *of America.* 2009. pp. 12217–12218. doi:10.1073/pnas.0906427106
- 728 11. De Lange T. Shelterin-mediated telomere protection. *Annu Rev Genet.* 2018;52:  
729 223–247. doi:10.1146/annurev-genet-032918-021921
- 730 12. Shay JW, Wright WE. Telomeres and telomerase: three decades of progress. *Nat*  
731 *Rev Genet.* 2019;20: 299–309. doi:10.1038/s41576-019-0099-1

## ***Ku essentiality in humans***

- 732 13. Fisher TS, Zakian VA. Ku: A multifunctional protein involved in telomere  
733 maintenance. *DNA Repair*. Elsevier; 2005. pp. 1215–1226.  
734 doi:10.1016/j.dnarep.2005.04.021
- 735 14. Porter SE, Greenwell PW, Ritchie KB, Petes TD. The DNA-binding protein Hdf1p  
736 (a putative Ku homologue) is required for maintaining normal telomere length in  
737 *Saccharomyces cerevisiae*. *Nucleic Acids Research*. 1996.
- 738 15. Melnikova L, Biessmann H, Georgiev P. The Ku protein complex is involved in  
739 length regulation of *Drosophila* telomeres. *Genetics*. 2005;170: 221–235.  
740 doi:10.1534/genetics.104.034538
- 741 16. Hsu HL, Gilley D, Galande SA, Prakash Hande M, Allen B, Kim SH, et al. Ku acts  
742 in a unique way at the mammalian telomere to prevent end joining. *Genes Dev*.  
743 2000;14: 2807–2812. doi:10.1101/gad.844000
- 744 17. Samper E, Goytisolo FA, Slijepcevic P, Van Buul PPW, Blasco MA. Mammalian  
745 Ku86 protein prevents telomeric fusions independently of the length of TTAGGG  
746 repeats and the G-strand overhang. *EMBO Rep*. 2000;1: 244–252.  
747 doi:10.1093/embo-reports/kvd051
- 748 18. D’Adda di Fagagna F, Hande MP, Tong WM, Roth D, Lansdorp PM, Wang ZQ, et  
749 al. Effects of DNA nonhomologous end-joining factors on telomere length and  
750 chromosomal stability in mammalian cells. *Curr Biol*. 2001;11: 1192–1196.  
751 doi:10.1016/S0960-9822(01)00328-1
- 752 19. Sui J, Zhang S, Chen BPC. DNA-dependent protein kinase in telomere  
753 maintenance and protection [Internet]. *Cellular and Molecular Biology Letters*.  
754 BioMed Central Ltd.; 2020. p. 2. doi:10.1186/s11658-020-0199-0
- 755 20. Chai W, Ford LP, Lenertz L, Wright WE, Shay JW. Human Ku70/80 associates  
756 physically with telomerase through interaction with hTERT. *J Biol Chem*.  
757 2002;277: 47242–47247. doi:10.1074/jbc.M208542200
- 758 21. Li G, Nelsen C, Hendrickson EA. Ku86 is essential in human somatic cells. *Proc*  
759 *Natl Acad Sci U S A*. 2002;99: 832–837. doi:10.1073/pnas.022649699
- 760 22. Wang Y, Ghosh G, Hendrickson EA. Ku86 represses lethal telomere deletion  
761 events in human somatic cells. *Proc Natl Acad Sci U S A*. 2009;106: 12430–  
762 12435. doi:10.1073/pnas.0903362106
- 763 23. Mazzucco G, Huda A, Galli M, Piccini D, Giannattasio M, Pessina F, et al.  
764 Telomere damage induces internal loops that generate telomeric circles. *Nat*  
765 *Commun*. 2020;11. doi:10.1038/s41467-020-19139-4
- 766 24. Nussenzweig A, Chen C, Soares VDC, Sanchez M, Sokol K, Nussenzweig MC, et  
767 al. Requirement for Ku80 in growth and immunoglobulin V(D)J recombination.  
768 *Nature*. 1996;382: 551–555. doi:10.1038/382551a0



## ***Ku essentiality in humans***

- 769 25. Gu Y, Seidl KJ, Rathbun GA, Zhu C, Manis JP, Van Der Stoep N, et al. Growth  
770 retardation and leaky SCID phenotype of Ku70-deficient mice. *Immunity*. 1997;7:  
771 653–665. doi:10.1016/S1074-7613(00)80386-6
- 772 26. De Sena-Tomas C, Yu EY, Calzada A, Holloman WK, Lue NF, Perez-Martin J.  
773 Fungal Ku prevents permanent cell cycle arrest by suppressing DNA damage  
774 signaling at telomeres. *Nucleic Acids Res*. 2015;43: 2138–2151.  
775 doi:10.1093/nar/gkv082
- 776 27. Ghosh G, Li G, Myung K, Hendrickson EA. The Lethality of Ku86 (XRCC5) Loss-  
777 of-Function Mutations in Human Cells is Independent of p53 (TP53). *Radiat Res*.  
778 2007;167: 66–79. doi:10.1667/rr0692.1
- 779 28. Uegaki K, Adachi N, So S, Iizumi S, Koyama H. Heterozygous inactivation of  
780 human Ku70/Ku86 heterodimer does not affect cell growth, double-strand break  
781 repair, or genome integrity. *DNA Repair (Amst)*. 2006;5: 303–311.  
782 doi:10.1016/j.dnarep.2005.10.008
- 783 29. Fattah KR, Ruis BL, Hendrickson EA. Mutations to Ku reveal differences in human  
784 somatic cell lines. 2008; doi:10.1016/j.dnarep.2008.02.008
- 785 30. Saydam O, Saydam N. Deficiency of Ku Induces Host Cell Exploitation in Human  
786 Cancer Cells. *Front Cell Dev Biol*. 2021;9: 1–9. doi:10.3389/fcell.2021.651818
- 787 31. Wolfs JM, Hamilton TA, Lant JT, Laforet M, Zhang J, Salemi LM, et al. Biasing  
788 genome-editing events toward precise length deletions with an RNA-guided  
789 TevCas9 dual nuclease. *Proc Natl Acad Sci U S A*. 2016;113: 14988–14993.  
790 doi:10.1073/pnas.1616343114
- 791 32. Myung K, Ghosh G, Fattah FJ, Li G, Kim H, Dutia A, et al. Regulation of Telomere  
792 Length and Suppression of Genomic Instability in Human Somatic Cells by Ku86.  
793 *Mol Cell Biol*. 2004;24: 5050–5059. doi:10.1128/mcb.24.11.5050-5059.2004
- 794 33. Jaco I, Muñoz P, Blasco MA. Role of human Ku86 in telomere length  
795 maintenance and telomere capping. *Cancer Res*. 2004;64: 7271–7278.  
796 doi:10.1158/0008-5472.CAN-04-1381
- 797 34. Wang Y, Ghosh G, Hendrickson EA. Ku86 represses lethal telomere deletion  
798 events in human somatic cells. *Proc Natl Acad Sci U S A*. 2009;106: 12430–  
799 12435. doi:10.1073/pnas.0903362106
- 800 35. Pansare K, Raj Singh S, Chakravarthy V, Gupta N, Hole A, Gera P, et al. Raman  
801 Spectroscopy: An Exploratory Study to Identify Post-Radiation Cell Survival.  
802 <https://doi.org/10.1177/0003702820908352>. 2020;74: 553–562.  
803 doi:10.1177/0003702820908352
- 804 36. Slattery SS, Wang H, Giguere DJ, Kocsis C, Urquhart BL, Karas BJ, et al.  
805 Plasmid-based complementation of large deletions in *Phaeodactylum tricornutum*



## ***Ku essentiality in humans***

- 806 biosynthetic genes generated by Cas9 editing. *Sci Reports* 2020 101. 2020;10: 1–  
807 12. doi:10.1038/s41598-020-70769-6
- 808 37. Wang Y, Ghosh G, Hendrickson EA. Ku86 represses lethal telomere deletion  
809 events in human somatic cells [Internet]. *Proceedings of the National Academy of*  
810 *Sciences of the United States of America*. 2009. doi:10.1073/pnas.0903362106
- 811 38. Rossiello F, Jurk D, Passos JF, d’Adda di Fagagna F. Telomere dysfunction in  
812 ageing and age-related diseases. *Nat Cell Biol* 2022 242. 2022;24: 135–147.  
813 doi:10.1038/s41556-022-00842-x
- 814 39. Li B, Reddy S, Comai L. Depletion of Ku70/80 reduces the levels of  
815 extrachromosomal telomeric circles and inhibits proliferation of ALT cells. *Aging*  
816 (Albany NY). 2011;3: 395. doi:10.18632/AGING.100308
- 817 40. He B, Lu N, Zhou Z. Cellular and Nuclear Degradation during Apoptosis. *Curr*  
818 *Opin Cell Biol*. 2009;21: 900. doi:10.1016/J.CEB.2009.08.008
- 819 41. Xu X, Shi Y chang, Gao W, Mao G, Zhao G, Agrawal S, et al. The novel  
820 presenilin-1-associated protein is a proapoptotic mitochondrial protein. *J Biol*  
821 *Chem*. 2002;277: 48913–48922. doi:10.1074/jbc.M209613200
- 822 42. Lamarca V, Sanz-Clemente A, Pérez-Pé R, Martínez-Lorenzo MJ, Halaihel N,  
823 Muniesa P, et al. Two isoforms of PSAP/MTCH1 share two proapoptotic domains  
824 and multiple internal signals for import into the mitochondrial outer membrane. *Am*  
825 *J Physiol - Cell Physiol*. 2007;293.  
826 doi:10.1152/AJPCCELL.00431.2006/ASSET/IMAGES/LARGE/ZH00100753840009  
827 .JPEG
- 828 43. Bensaad K, Tsuruta A, Selak MA, Vidal MNC, Nakano K, Bartrons R, et al.  
829 TIGAR, a p53-inducible regulator of glycolysis and apoptosis. *Cell*. 2006;126:  
830 107–120. doi:10.1016/J.CELL.2006.05.036
- 831 44. Lee P, Vousden KH, Cheung EC. TIGAR, TIGAR, burning bright. *Cancer Metab*  
832 2014 21. 2014;2: 1–9. doi:10.1186/2049-3002-2-1
- 833 45. Widden H, Placzek WJ. The multiple mechanisms of MCL1 in the regulation of  
834 cell fate. *Commun Biol* 2021 41. 2021;4: 1–12. doi:10.1038/s42003-021-02564-6
- 835 46. Das S, Maitra U. Functional significance and mechanism of eIF5-promoted GTP  
836 hydrolysis in eukaryotic translation initiation. *Prog Nucleic Acid Res Mol Biol*.  
837 2001;70: 207–231. doi:10.1016/S0079-6603(01)70018-9
- 838 47. Ma F, Li X, Ren J, Guo R, Li Y, Liu J, et al. Downregulation of eukaryotic  
839 translation initiation factor 3b inhibited proliferation and metastasis of gastric  
840 cancer. *Cell Death Dis* 2019 109. 2019;10: 1–12. doi:10.1038/s41419-019-1846-0
- 841 48. Song S, Liu J, Zhang M, Gao X, Sun W, Liu P, et al. Eukaryotic translation

## ***Ku essentiality in humans***

- 842 initiation factor 3 subunit B could serve as a potential prognostic predictor for  
843 breast cancer. *Bioengineered*. 2022;13: 2762–2776.  
844 doi:10.1080/21655979.2021.2017567/SUPPL\_FILE/KBIE\_A\_2017567\_SM8035.Z  
845 IP
- 846 49. Miyoshi M, Okajima T, Matsuda T, Fukuda MN, Nadano D. Bystin in human  
847 cancer cells: intracellular localization and function in ribosome biogenesis.  
848 *Biochem J*. 2007;404: 373. doi:10.1042/BJ20061597
- 849 50. Young CL, Karbstein K. The roles of S1 RNA-binding domains in Rrp5's  
850 interactions with pre-rRNA. *RNA*. 2011;17: 512. doi:10.1261/RNA.2458811
- 851 51. Piñeiro D, Stoneley M, Ramakrishna M, Alexandrova J, Dezi V, Juke-Jones R, et  
852 al. Identification of the RNA polymerase I-RNA interactome. *Nucleic Acids Res*.  
853 2018;46: 11002–11013. doi:10.1093/NAR/GKY779
- 854 52. Shao Z, Flynn RA, Crowe JL, Zhu Y, Liang J, Jiang W, et al. DNA-PKcs has KU-  
855 dependent function in rRNA processing and haematopoiesis. *Nature*. 2020;579:  
856 291–296. doi:10.1038/s41586-020-2041-2
- 857 53. Nelson HA, Roe MW. Molecular physiology and pathophysiology of stromal  
858 interaction molecules. *Exp Biol Med*. 2018;243: 451.  
859 doi:10.1177/1535370218754524
- 860 54. Ibsen MS, Gad HH, Thavachelvam K, Boesen T, Desprès P, Hartmann R. The 2'-  
861 5'-Oligoadenylate Synthetase 3 Enzyme Potently Synthesizes the 2'-5'-  
862 Oligoadenylates Required for RNase L Activation. *J Virol*. 2014;88: 14222.  
863 doi:10.1128/JVI.01763-14
- 864 55. Anisenko AN, Knyazhanskaya ES, Zatsepin TS, Gottikh MB. Human Ku70 protein  
865 binds hairpin RNA and double stranded DNA through two different sites.  
866 *Biochimie*. 2017;132: 85–93. doi:10.1016/J.BIOCHI.2016.11.001
- 867 56. Shiba Y, Randazzo PA. ArfGAP1 function in COPI mediated membrane traffic:  
868 Currently debated models and comparison to other coat-binding ArfGAPs. *Histol*  
869 *Histopathol*. 2012;27: 1143. doi:10.14670/HH-27.1143
- 870 57. Li J, D'Angiolella V, Seeley ES, Kim S, Kobayashi T, Fu W, et al. USP33  
871 regulates centrosome biogenesis via de-ubiquitylation of a centriolar protein,  
872 CP110. *Nature*. 2013;495: 255–259. doi:10.1038/NATURE11941
- 873 58. Muñoz P, Zdzienicka MZ, Blanchard J-M, Piette J. Hypersensitivity of Ku-Deficient  
874 Cells toward the DNATopoisomerase II Inhibitor ICRF-193 Suggests a Novel Role  
875 for KuAntigen during the G2 and M Phases of the CellCycle. *Mol Cell Biol*.  
876 1998;18: 5797. doi:10.1128/MCB.18.10.5797
- 877 59. Rampakakis E, Di Paola D, Zannis-Hadjopoulos M. Ku is involved in cell growth,  
878 DNA replication and G1-S transition. *J Cell Sci*. 2008;121: 590–600.

- 879           doi:10.1242/jcs.021352
- 880   60.   You W, Tan G, Sheng N, Gong J, Yan J, Chen D, et al. Downregulation of myosin  
881   VI reduced cell growth and increased apoptosis in human colorectal cancer. *Acta*  
882   *Biochim Biophys Sin (Shanghai)*. 2016;48: 430. doi:10.1093/ABBS/GMW020
- 883   61.   Wang D, Zhu L, Liao M, Zeng T, Zhuo W, Yang S, et al. MYO6 knockdown  
884   inhibits the growth and induces the apoptosis of prostate cancer cells by  
885   decreasing the phosphorylation of ERK1/2 and PRAS40. *Oncol Rep*. 2016;36:  
886   1285–1292. doi:10.3892/OR.2016.4910/HTML
- 887   62.   O'Loughlin T, Masters TA, Buss F. The MYO6 interactome reveals adaptor  
888   complexes coordinating early endosome and cytoskeletal dynamics. *EMBO Rep*.  
889   2018;19: e44884. doi:10.15252/EMBR.201744884
- 890   63.   Eto K, Goto S, Nakashima W, Ura Y, Abe SI. Loss of programmed cell death 4  
891   induces apoptosis by promoting the translation of procaspase-3 mRNA. *Cell*  
892   *Death Differ* 2012 194. 2011;19: 573–581. doi:10.1038/cdd.2011.126
- 893   64.   Ran FA, Hsu PD, Wright J, Agarwala V, Scott DA, Zhang F. Genome engineering  
894   using the CRISPR-Cas9 system. *Nat Protoc* 2013 811. 2013;8: 2281–2308.  
895   doi:10.1038/nprot.2013.143
- 896   65.   Strathdee CA, McLeod MR, Hall JR. Efficient control of tetracycline-responsive  
897   gene expression from an autoregulated bi-directional expression vector. *Gene*.  
898   1999;229: 21–29. doi:10.1016/S0378-1119(99)00045-1
- 899   66.   Engler C, Kandzia R, Marillonnet S. A One Pot, One Step, Precision Cloning  
900   Method with High Throughput Capability. *PLoS One*. 2008;3: e3647.  
901   doi:10.1371/JOURNAL.PONE.0003647
- 902   67.   Maitland MER, Kuljanin M, Wang X, Lajoie GA, Schild-Poulter C. Proteomic  
903   analysis of ubiquitination substrates reveals a CTLH E3 ligase complex-  
904   dependent regulation of glycolysis. *FASEB J*. 2021;35.  
905   doi:10.1096/FJ.202100664R
- 906   68.   Zhou Y, Zhou B, Pache L, Chang M, Khodabakhshi AH, Tanaseichuk O, et al.  
907   Metascape provides a biologist-oriented resource for the analysis of systems-level  
908   datasets. *Nat Commun*. 2019;10. doi:10.1038/S41467-019-09234-6
- 909   69.   Perez-Riverol Y, Csordas A, Bai J, Bernal-Llinares M, Hewapathirana S, Kundu  
910   DJ, et al. The PRIDE database and related tools and resources in 2019:  
911   Improving support for quantification data. *Nucleic Acids Res*. 2019;47: D442–  
912   D450. doi:10.1093/nar/gky1106

913

914

915 **Figure Legends**

916 **Fig. 1 CRISPR Knockout Strategy, Screening, and Validation of Potential Ku70**

917 **Knockouts**

918 **A.** Expression of Ku70 in TReX-293 cells after stable integration of exogenous Ku70-HA  
919 cDNA cells following Dox release. Extracts were collected from cells supplied with Dox  
920 (Day 1), and at subsequent days following Dox withdrawal (as indicated at the top).

921 Extracts were run on SDS-PAGE and analyzed by western blot with the indicated  
922 antibodies. Both exogenous HA-Ku70 and endogenous Ku70 are detected by a Ku70  
923 antibody and the depletion of Ku70-HA is tracked via HA tag. + indicates doxycycline  
924 (Dox) in cell media. - indicates Dox was removed from cell media. **B.** Quantification of

925 the depletion of exogenous Ku70-HA normalized to alpha-tubulin Data are plotted as  
926 the mean of 3 biological replicates with error bars reporting +/- SEM. \* indicates  
927 significant change compared to Day 1 Dox ( $p < 0.005$ ). **C.** Schematic of the CRISPR

928 mediated knockout of endogenous Ku70 through targeting of exon/intron junctions at  
929 exons 7, 6, and 12 respectively. **D.** Analysis of Ku70 CRISPR knockout clones. Whole

930 cell extracts from indicated clonal cells cultured in the presence (+) or absence (-) of  
931 Dox for at least 7 days were analyzed by western blot with the indicated antibodies. C

932 indicates TReX-293 Ku70-HA control cells. Arrows indicate candidate knockouts. **E.**

933 Mutations at target site 1 (Exon 7) and target 2 (Exon 6) for three Ku70 knockout clones.

934 The wild-type sequence (C) is shown at top and dashes indicate indels found in the  
935 edited cell lines. The guide RNA is shown by the black bar above the sequence with the  
936 PAM sequence in red.

937

938 **Fig. 2 Loss of cell viability following depletion of Ku70 in conditional Ku70**

939 **knockout clones**

940 **A.** Western blot of Dox depletion curve for the SB Ku70 knockout clone on the indicated  
941 days. Whole cell extracts from SB cells cultured in presence (+) or absence (-) of Dox  
942 and were analyzed by western blot with the indicated antibodies. **B.** Quantification of  
943 Ku70 relative to alpha-tubulin plotted as the mean of 3 biological replicates with error  
944 bars reporting +/- SEM. \* indicates Ku70 is significantly changed compared to Day 1 Dox  
945 ( $p < 0.05$ ). **C.** Cell morphology of Ku70 knockout cells maintained in Dox and on Day 8  
946 post Dox withdrawal. Cells were visualized by phase-contrast with a 20X magnification.  
947 **C.** Images of cells stained with crystal violet fixed at Day 7 and Day 9 post Dox  
948 withdrawal. **D.** Crystal violet assay assessing cell viability following loss of Ku70  
949 expression. TReX-293 Ku70-HA Control cells, and two Ku70 knockout clones, Sa11  
950 and TI were cultured with Dox (Dox On) or without Dox (Dox Off) and plated on 96-well  
951 plate at Day 5. Cells were fixed and stained at days 5 to 9. **E.** Crystal violet assays were  
952 quantified and plotted ( $n=3$  for each time point). All points are nudged 0.1 along x-axis  
953 to allow differentiation between samples.

954

955 **Fig. 3 Cell viability in Ku70 knockouts is not correlated with telomere shortening**  
956 **or  $\gamma$ H2AX foci accumulation**

957 **A.** Representative telomere restriction fragment (TRF) analysis of control cells  
958 compared to Ku70 knockout cells (clones SB, Sa11, TI) following exogenous Ku70  
959 depletion on the days indicated. C1 denotes TRF kit control DNA (U937 cells). C2  
960 denotes unedited TReX-293 cells. TReX Ku70-HA denotes unedited TReX-293 cells

## ***Ku essentiality in humans***

961 with Dox-inducible exogenous Ku70. +/- indicate the presence or absence of Dox in cell  
962 media. Size markers are indicated on the side. **B.** Average telomere length  
963 measurements from TRF analyses (N=3). Day indicates what day samples were  
964 collected during Dox depletion curve. + or - indicates presence or absence of Dox in cell  
965 media. C1 is a control cancer cell line. C2 is TReX-293 cell line. **C.** Immunofluorescence  
966 images displaying  $\gamma$ H2AX foci in Ku70 knockout cells on the days indicated in media  
967 containing Dox or following Dox withdrawal (no Dox). TReX-293 Ku70-HA cells treated  
968 with 2 Gy of ionizing radiation act as a positive control. **D.** Density plots representing  
969 average number of foci per cell nucleus for each condition/treatment analyzed (N=3).  
970

971 **Fig. 4 Proteomic analysis following depletion of Ku and validation of altered**  
972 **proteins**

973 **A.** Quantification of relative abundance of Ku70:Vinculin protein LFQ intensities in SB  
974 clone samples from cells maintained in Dox (+) or without Dox (-) at the indicated days  
975 in culture. Ku70 relative abundance was set at 1 at Day 1. +indicates Dox is added to  
976 cell media. - indicates Dox has been removed from cell media. **B.** Quantification of  
977 relative abundance of Ku80:Vinculin protein LFQ intensities compared to the Day 1  
978 control, as plotted in A. **C.** Venn diagram of the number of proteins found to be  
979 decreased or increased significantly on Days 4, 6, and 7 post Dox withdrawal (Fold-  
980 change  $\geq 1.5$ ; p-value  $\leq 0.05$ ). **D.** Western blot validation of proteomic analysis results  
981 for 3 candidate proteins at the days listed post Dox withdrawal for the SB Ku70  
982 knockout clone. **E.** Quantification of MYO6, EIF3B, and PDCD4 protein levels relative to



## ***Ku essentiality in humans***

983 alpha-tubulin for (N=3) western blots. +/- indicates the presence or absence of Dox from  
984 cell media. Day post Dox withdrawal are indicated.

985

### 986 **Fig. 5 Global Proteomic Changes in Ku70 Knockout Cells May Indicate Non-** 987 **Canonical Essential Function for Ku70**

988 **A.** Enriched biological terms associated with significantly decreased proteins from  
989 proteomic analysis on days 4, 6, and 7 no Dox ( $FC \geq 1.5$ ,  $p\text{-value} \leq 0.05$ ). **B.** Enriched  
990 biological terms associated with significantly increased proteins from proteomic analysis  
991 on days 4, 6, and 7 no Dox ( $FC \geq 1.5$ ,  $p\text{-value} \leq 0.05$ ). Pathway and process enrichment  
992 analysis was performed via Metascape and the top 10 enriched terms for each day are  
993 displayed in a heatmap ( $p\text{-value} < 0.01$ , minimum count of 3, enrichment factor  $> 1.5$ ).  
994 Enriched terms are coloured according to p-value. The p-values are displayed as LogP.

995

### 996 **Supplementary Information**

#### 997 **S1 Fig. Targeting Three Exon/Intron Junctions for CRISPR editing.**

998 Three gRNAs were designed to target the Exon/Intron junctions of Exons 7, 6, and 12  
999 respectively. SaCas9 or TevCas9 endonucleases were used to induce cleavage at the  
1000 target sites. Expected cut sites are indicated by red lines in the sequence.

1001

#### 1002 **S2 Fig. Average $\gamma$ H2AX foci accumulation does not change significantly following** 1003 **Dox withdrawal compared to IR treated cells**

1004 **A.** The average number of  $\gamma$ H2AX foci/nucleus in Ku70 knockout cells on the days  
1005 indicated in media containing Dox or following Dox withdrawal (no Dox) (N=3). TReX-  
1006 293 Ku70-HA cells treated with 2 Gy of ionizing radiation (IR) act as a positive control.

## ***Ku essentiality in humans***

1007 TREx-293 Ku70-HA cells treated with 2 Gy of ionizing radiation are significantly different  
1008 from untreated TREx-293 Ku70-HA cells and Ku70 knockout cells as denoted by \*  
1009 symbol, but average foci accumulation in knockout cells is not significantly different from  
1010 unedited TREx-293 Ku70-HA cells as denoted by ns (Ordinary One-Way ANOVA,  
1011 multiple comparisons,  $p < 0.001$ ).

1012

### **S3 Fig. Volcano plots of altered proteins following Ku70-HA withdrawal**

1014 Proteins found to be decreased or increased significantly on **A.** Day 4, **B.** Day 6, and **C.**  
1015 Day 7 post Dox withdrawal (Fold-change  $\geq 1.5$ ;  $p$ -value  $\leq 0.05$ ). The gray line bisecting  
1016 the y-axis denotes a  $p$ -value of 0.05. Following Ku withdrawal, proteins with a fold-  
1017 change of 1.5 or greater compared to growth-matched controls for each day are  
1018 denoted by red points on the volcano plot. Proteins that are decreased compared to  
1019 controls have a negative  $\log(\text{Fold Change})$  and proteins that are increased have a  
1020 positive  $\log(\text{Fold Change})$ .

1021

### **S4 Fig. Western blot validation of proteomic data for EIF3B, MYO6, and PDCD4 candidates in alternate Ku70 knockout clone, Sa11**

1024 **A.** Western blot validation of proteomic analysis results for 3 candidate proteins at the  
1025 days listed post Dox withdrawal for the Sa11 Ku70 knockout clone. All samples are from  
1026 one experiment, but the top and bottom panels are from 2 different western blots. **B.**  
1027 Quantification of MYO6, EIF3B, and PDCD4 protein levels relative to alpha-tubulin for  
1028 (N=3) western blots. +/- indicates the presence or absence of Dox from cell media. Day  
1029 post Dox withdrawal are indicated.



***Ku essentiality in humans***

1030 **S1 Data. Sanger sequencing data and DECODR analysis confirmation of Ku70**  
1031 **editing at target sites 1 and 2 for Sa11, SB, and TI Ku70 knockout clones**  
1032  
1033 **S2 Data. List of proteins quantified in at least 3 samples in proteomic analysis by**  
1034 **mass spectrometry**  
1035  
1036 **S3 Data. Lists of proteins found to be significantly changed ( $\geq 1.5$  fold-change, p-**  
1037 **value  $\leq 0.05$ ) compared to growth-matched controls on Day 4, Day 6, and Day 7**  
1038  
1039 **S4 Data. Student's two-way t-tests for proteomic analysis for Day 4, Day 6, and**  
1040 **Day 7**  
1041  
1042 **S5 Data. Metascape results for protein lists significantly changed ( $\geq 1.5$  fold-**  
1043 **change, p-value  $\leq 0.05$ ) compared to growth-matched controls on Day 4, Day 6,**  
1044 **and Day 7**

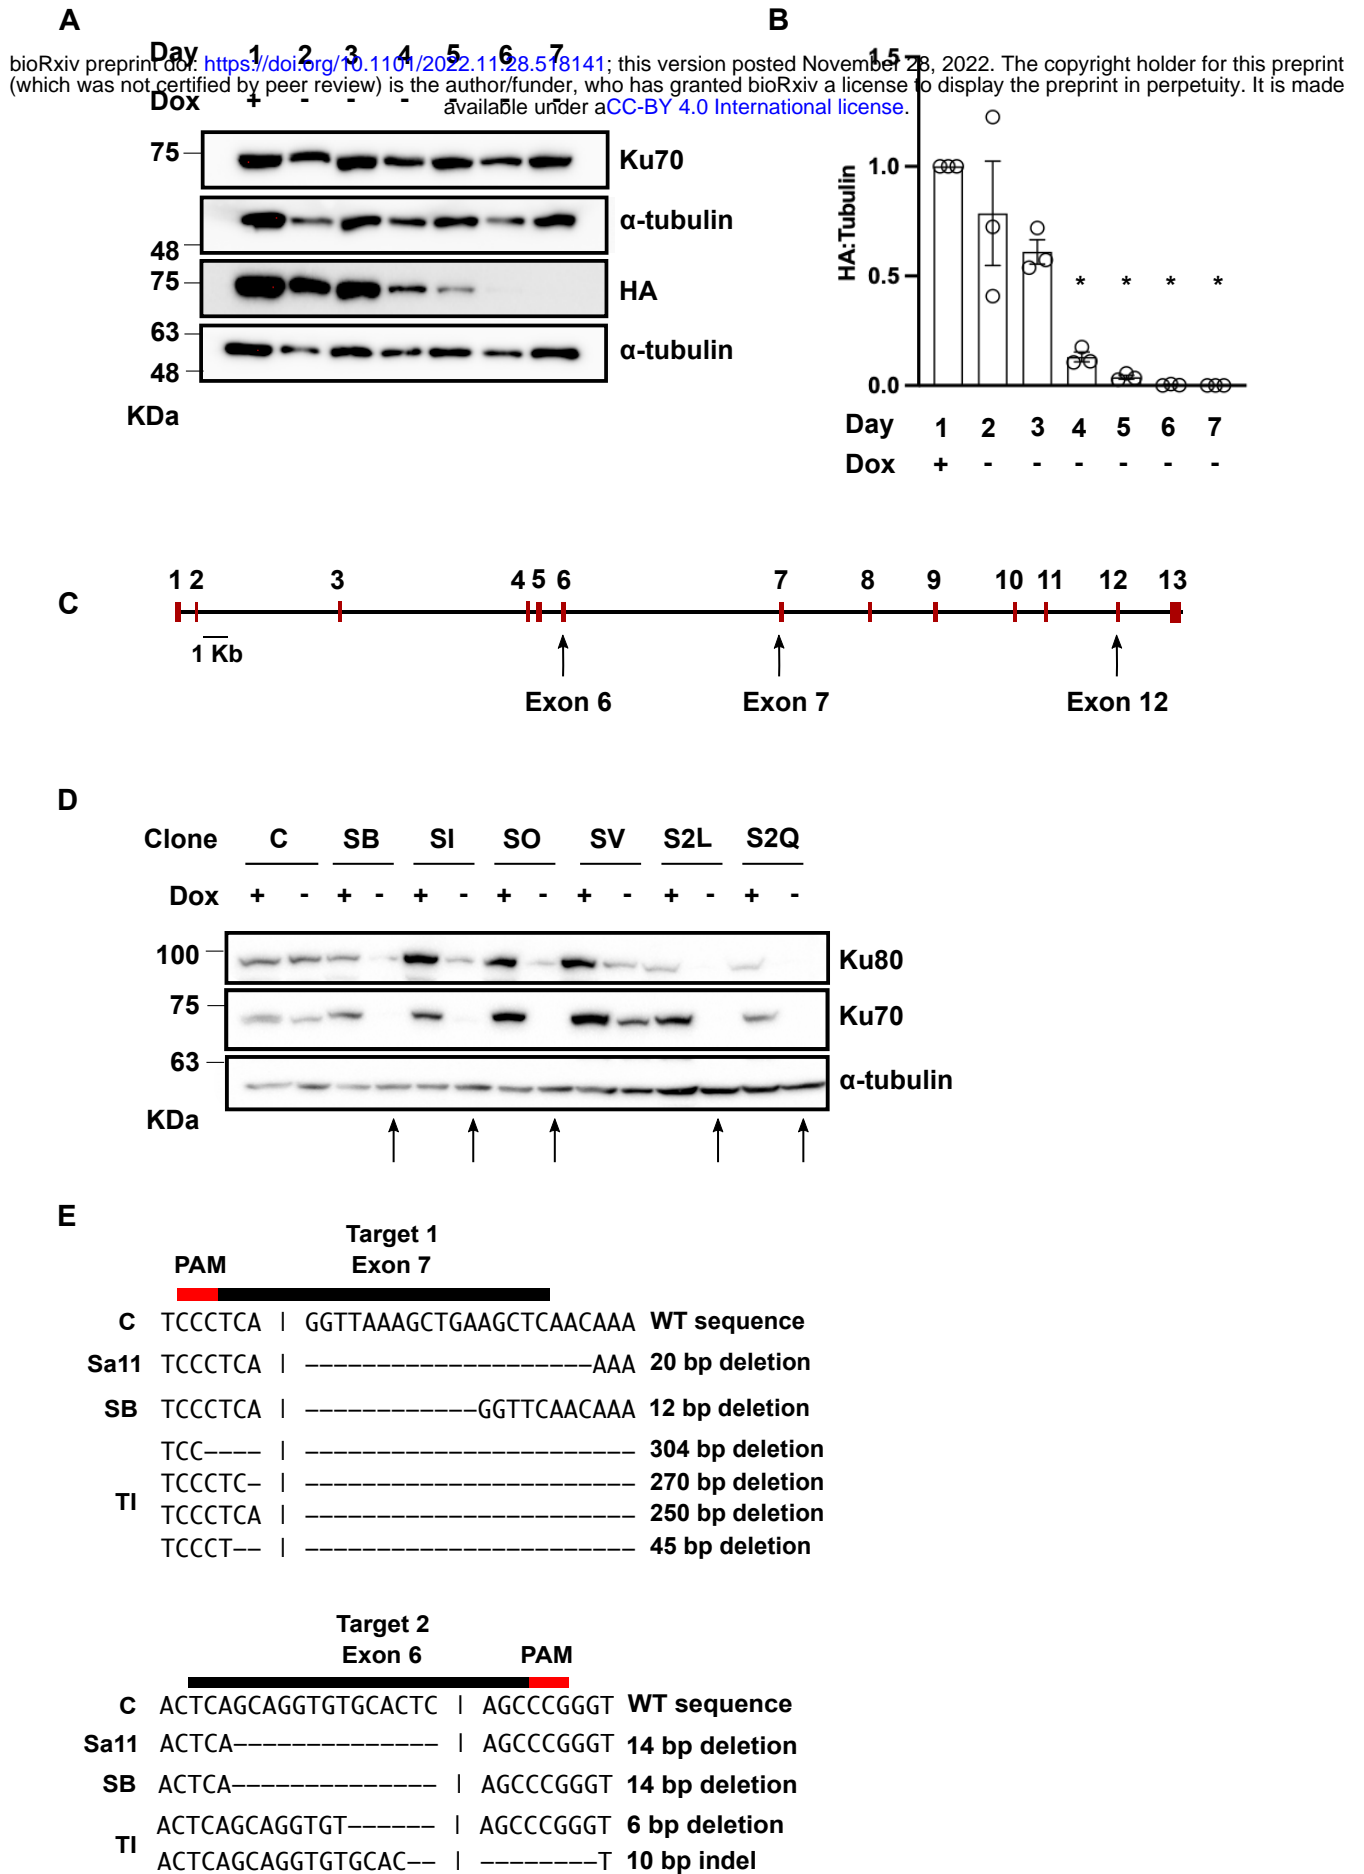

Figure 1

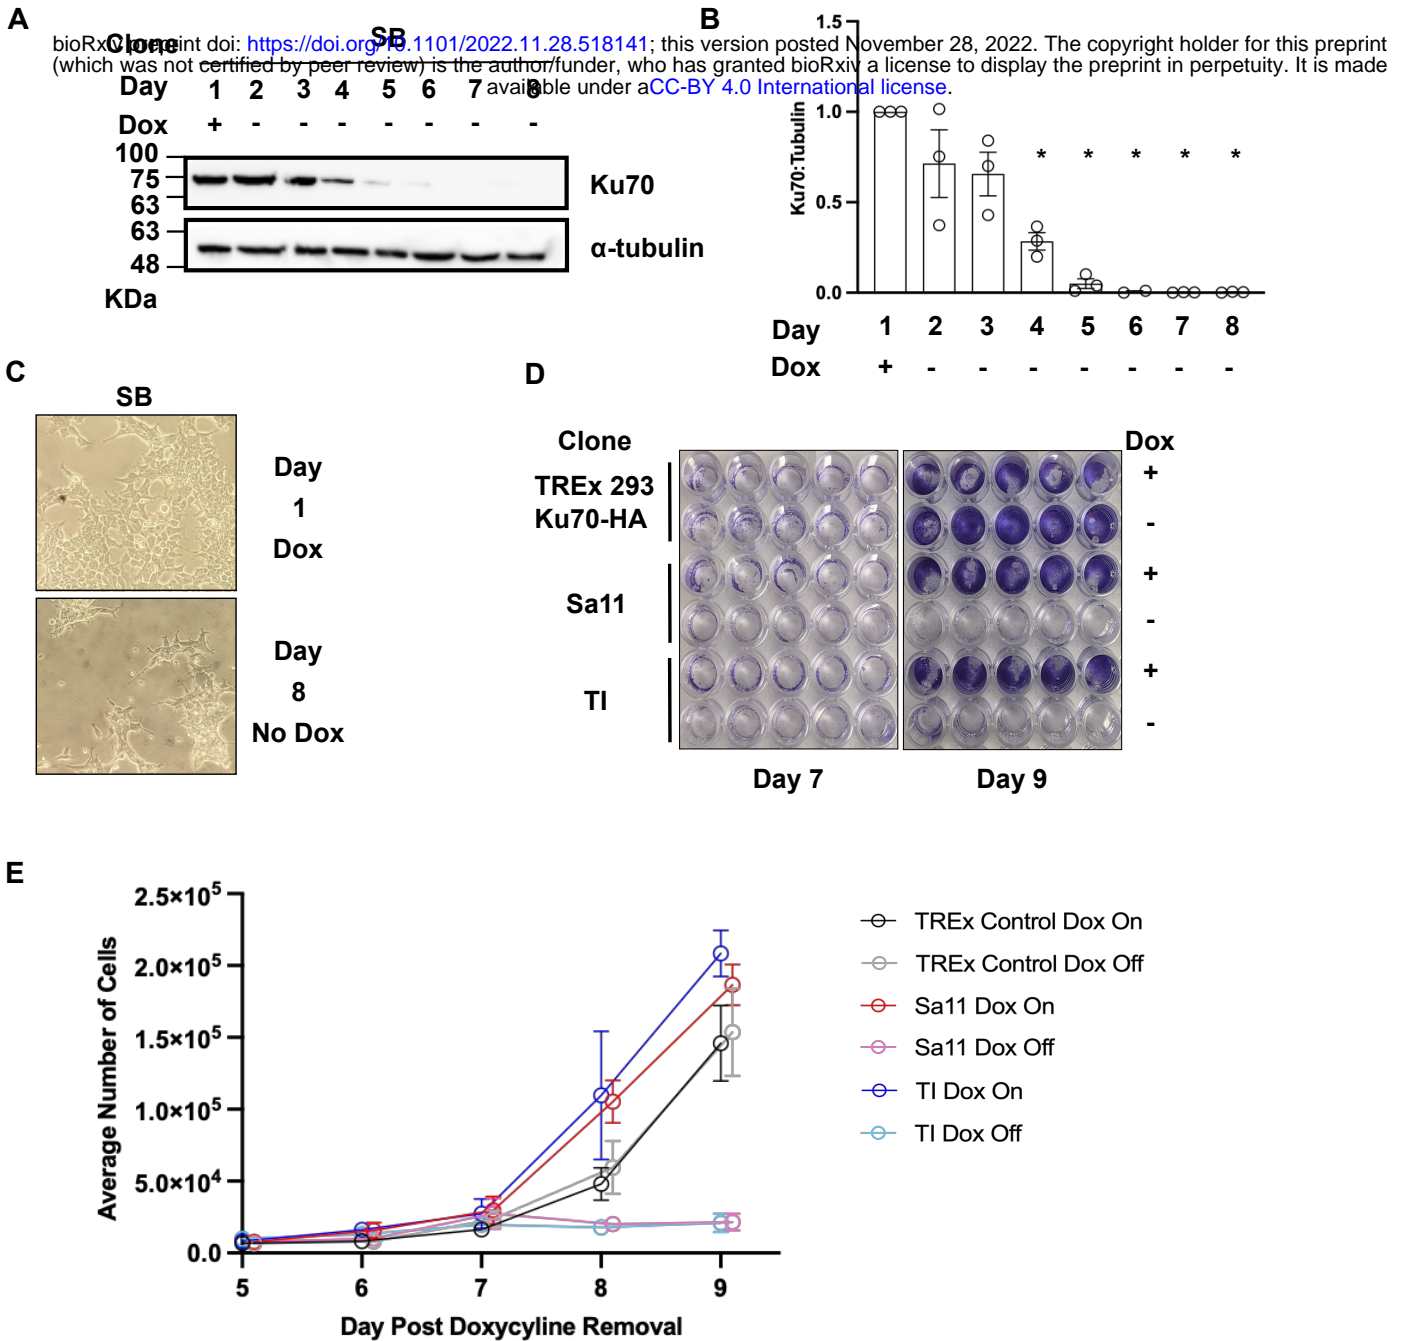

Figure 2

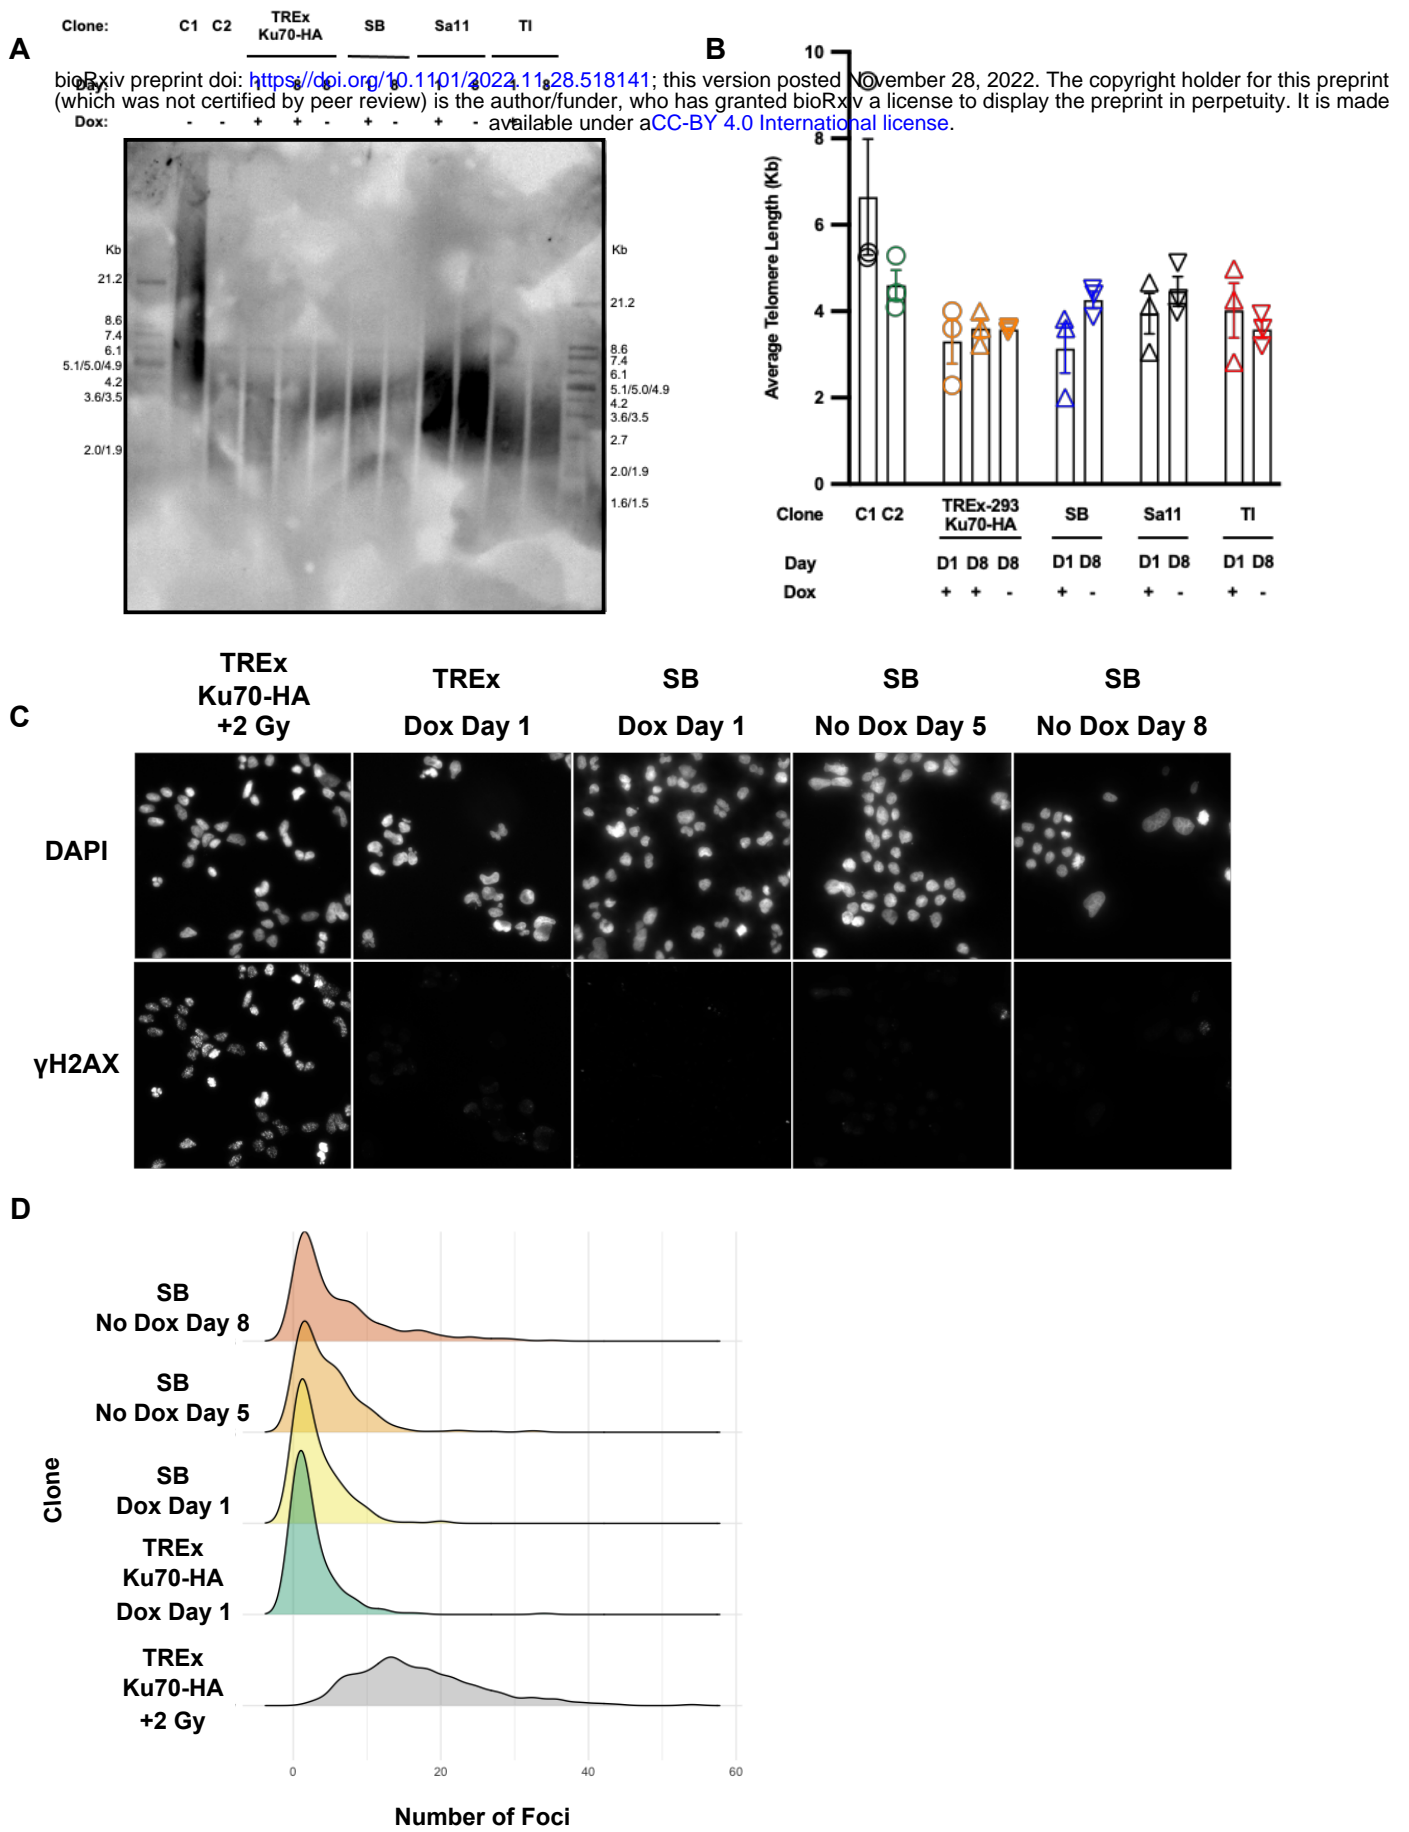

Figure 3

**A**

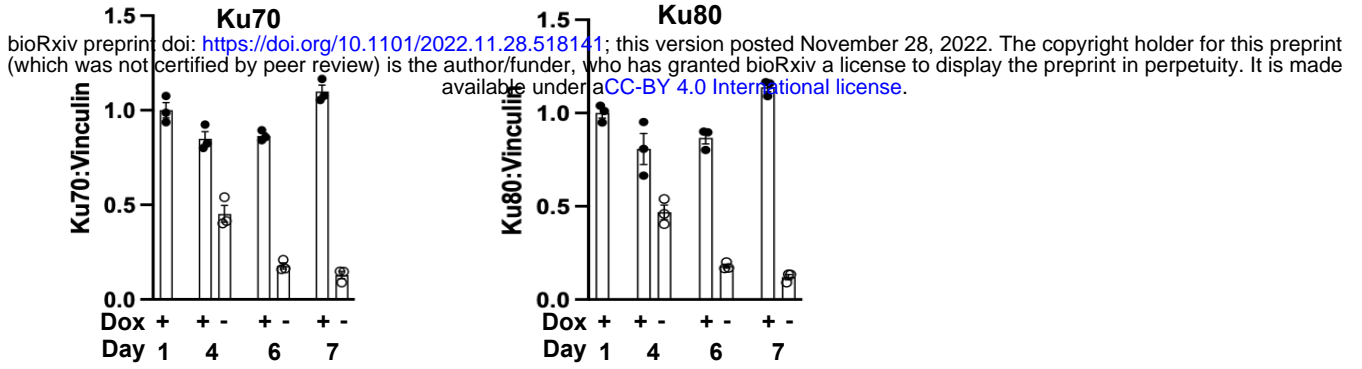

**B**

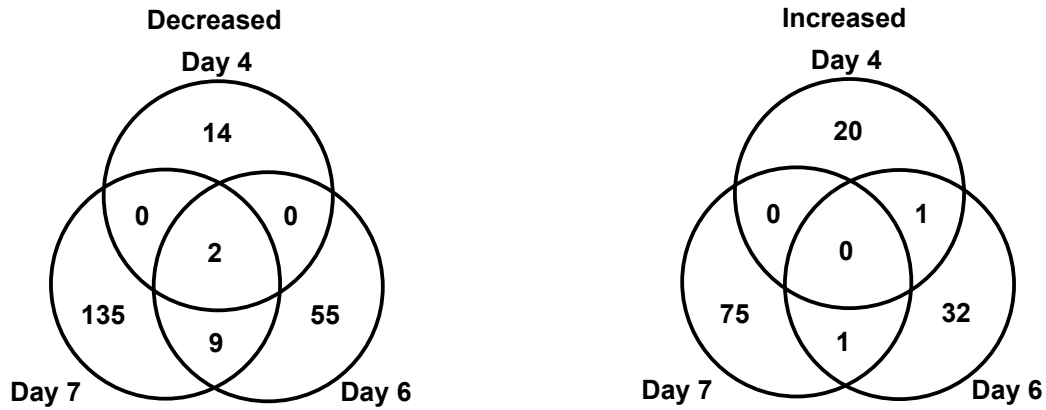

**C**

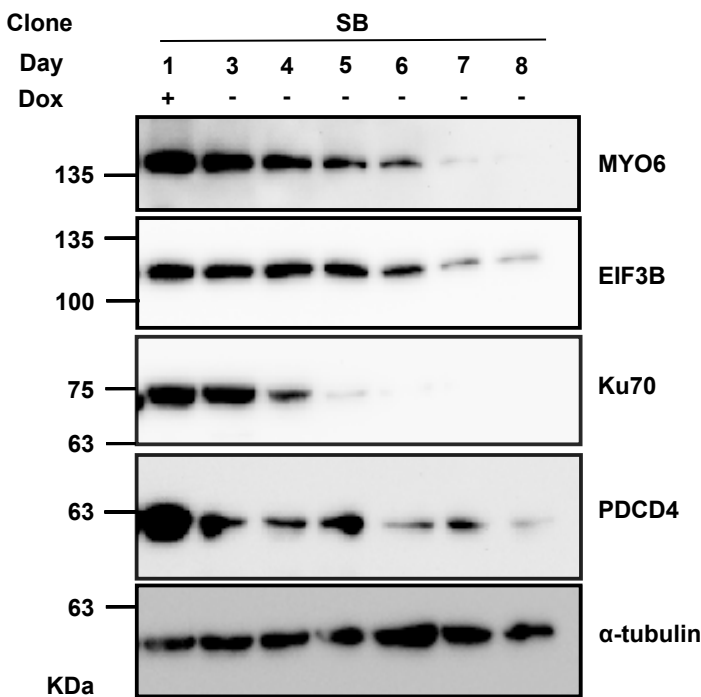

**D**

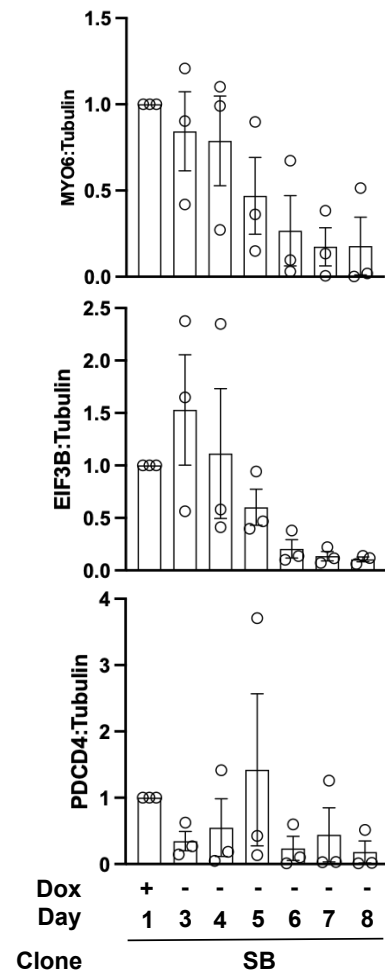

**Figure 4**

**A** bioRxiv preprint doi: <https://doi.org/10.1101/2022.11.28.518141>; this version posted November 28, 2022. The copyright holder for this preprint (which was not certified by peer review) is the author/funder, who has granted bioRxiv a license to display the preprint in perpetuity. It is made available under a [CC-BY 4.0 International license](https://creativecommons.org/licenses/by/4.0/).

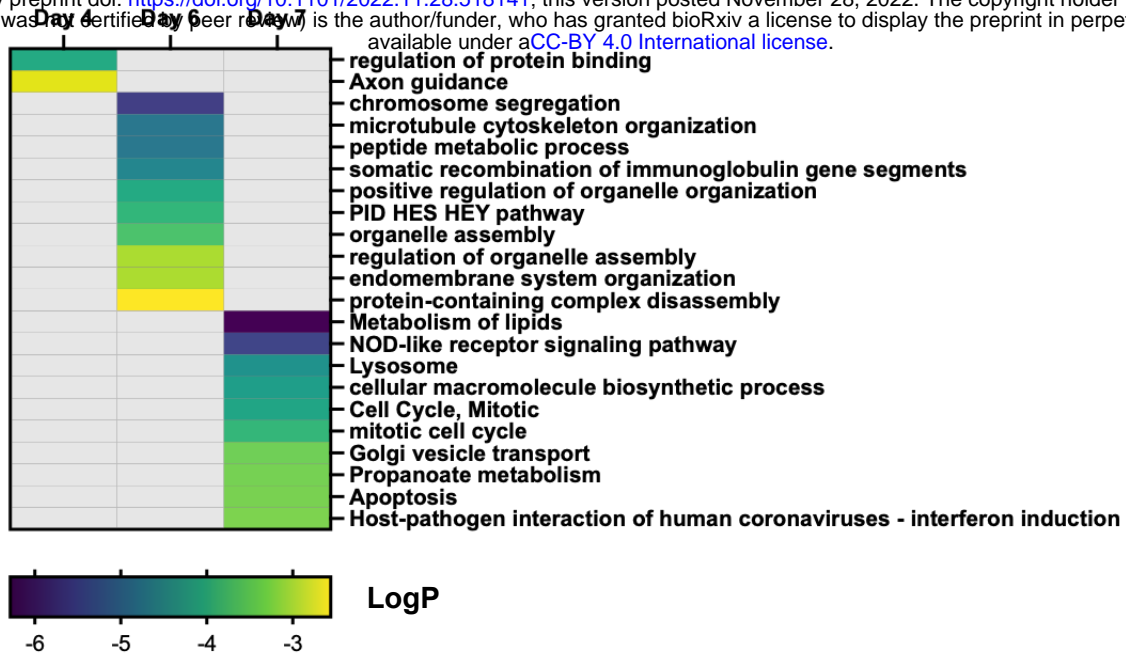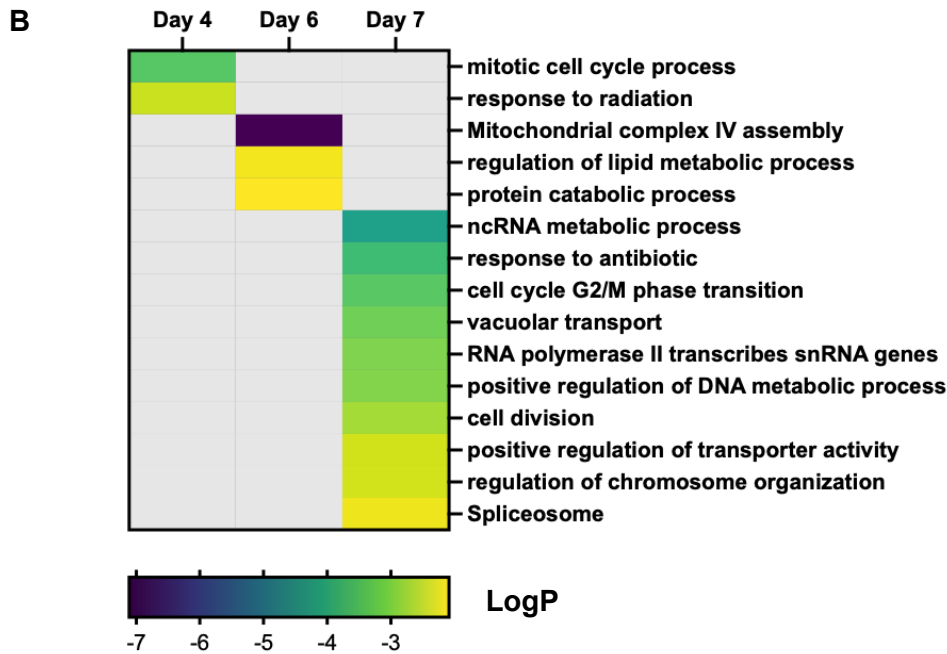

**Figure 5**
